# Supplementary material for: The Government Finance Database: A Common Resource for Quantitative Research in Public Financial Analysis
Source: PLOS journal article supplement (doi:10.1371/journal.pone.0130119), 2015-06-24
Supplement: S5 (10.1371/journal.pone.0130119.s005) [file journal.pone.0130119.s005]

## Appendix A: Replication of Data Consolidation

Instructions for replicating the the process of data organization we followed.

- Obtain the relevant files from the census: four (4) “fin\_data” files from 2008 – 2011, and one (1) “IndFin\_1967-2007.zip” file.
  - (Contact information is available from: <http://www.census.gov/govs/local/>)
- Extract these files to a directory on your computer
- Make sure that you have at least 20GB of space available on the drive where your SAS work directory is located, since the data files stored in memory get very large during this process.
- Paste the code from appendix C into a SAS program file.
- Change the directories referenced in the code so that they will work on your machine. There are several locations for these:
  - Line 4
    - Make sure to include the final “/IndFin0” after the file path pointing to the 1967-2007 folder.
  - Line 46
    - Make sure to include the final “/IndFin” (different from above) after the file path pointing to the 1967-2007 folder.
  - Line 114
    - This should point to the data file containing the 2011 data, the text “2011FinEstDAT\_ALL5modp\_pu.txt” fits the current census data, but these naming conventions change regularly.
  - Line 142
    - This should point to the file containing the 2011 government ID information
  - Line 168
    - Points to the 2010 financial data text file.
  - Line 196
    - Points to the 2010 government ID file.
  - Line 222
    - Points to the 2009 financial data text file.
  - Line 250
    - Points to the 2009 government ID file.
  - Line 276
    - Points to the 2008 financial data text file.
  - Line 304
    - Points to the 2008 government ID file.
  - Line 1189
    - This points to the location and file name where the final comma separated data file should be exported and saved.
- Run the SAS program, it should output a csv file with the consolidated data to the location you indicated on line 1189.

## Appendix B: Mapping Natural Language Variables to Census Data Codes

In table A1 we display the census codes used to create each of the database variables, or present a formula in cases where the variable is computed from other database variables. Variables listed as “.” Do not have a data code in the newest census data and will not have complete coverage in the database as a result. IGR stands for “intergovernmental revenue”, NEC stands for “not elsewhere classified”, LTD stands for “long term debt”, FFC stands for “full faith and credit”, and NG stands for “not guaranteed”.

**TABLE A1**  
**Corresponding Census Codes or Formulas for Each Database Variable**

| Database Variable Name | Census Data Codes or Formula                                                                                                                                                                                                                                                                                                                                                                                                                                                                                                                                         |
|------------------------|----------------------------------------------------------------------------------------------------------------------------------------------------------------------------------------------------------------------------------------------------------------------------------------------------------------------------------------------------------------------------------------------------------------------------------------------------------------------------------------------------------------------------------------------------------------------|
| Total_Revenue          | B01, B21, B22, B30, B42, B46, B50, B59, B79, B80, B89, B91, B92, B93, B94, C21, C30, C42, C46, C50, C79, C80, C89, C91, C92, C93, C94, D21, D30, D42, D46, D50, D79, D80, D89, D91, D92, D93, D94, T01, T09, T10, T11, T12, T13, T14, T15, T16, T19, T20, T21, T22, T23, T24, T25, T27, T28, T29, T40, T41, T50, T51, T53, T99, A01, A03, A09, A10, A12, A16, A18, A21, A36, A44, A45, A50, A56, A59, A60, A61, A80, A81, A87, A89, U01, U11, U20, U21, U30, U40, U41, U50, U95, U99, A90, A91, A92, A93, A94, X01, X02, X05, X08, Y01, Y02, Y04, Y11, Y12, Y51, Y52 |
| Total_Rev_Own_Sources  | T01, T09, T10, T11, T12, T13, T14, T15, T16, T19, T20, T21, T22, T23, T24, T25, T27, T28, T29, T40, T41, T50, T51, T53, T99, A01, A03, A09, A10, A12, A16, A18, A21, A36, A44, A45, A50, A56, A59, A60, A61, A80, A81, A87, A89, U01, U11, U20, U21, U30, U40, U41, U50, U95, U99, A90, A91, A92, A93, A94, X01, X02, X05, X08, Y01, Y02, Y04, Y11, Y12, Y51, Y52                                                                                                                                                                                                    |
| General_Revenue        | B01, B21, B22, B30, B42, B46, B50, B59, B79, B80, B89, B91, B92, B93, B94, C21, C30, C42, C46, C50, C79, C80, C89, C91, C92, C93, C94, D21, D30, D42, D46, D50, D79, D80, D89, D91, D92, D93, D94, T01, T09, T10, T11, T12, T13, T14, T15, T16, T19, T20, T21, T22, T23, T24, T25, T27, T28, T29, T40, T41, T50, T51, T53, T99, A01, A03, A09, A10, A12, A16, A18, A21, A36, A44, A45, A50, A56, A59, A60, A61, A80, A81, A87, A89, U01, U11, U20, U21, U30, U40, U41, U50, U95, U99                                                                                 |
| Gen_Rev_Own_Sources    | A01, A03, A09, A10, A12, A16, A18, A21, A36, A44, A45, A50, A56, A59, A60, A61, A80, A81, A87, A89, T01, T09, T10, T11, T12, T13, T14, T15, T16, T19, T20, T21, T22, T23, T24, T25, T27, T28, T29, T40, T41, T50, T51, T53, T99, U01, U11, U20, U21, U30, U40, U41, U50, U95, U99                                                                                                                                                                                                                                                                                    |
| Total_Taxes            | T01, T09, T10, T11, T12, T13, T14, T15, T16, T19, T20, T21, T22, T23, T24, T25, T27, T28, T29, T40, T41, T50, T51, T53, T99                                                                                                                                                                                                                                                                                                                                                                                                                                          |
| Property_Tax           | T01                                                                                                                                                                                                                                                                                                                                                                                                                                                                                                                                                                  |
| Tot_Sales___Gr_Rec_Tax | T09, T10, T11, T12, T13, T14, T15, T16, T19                                                                                                                                                                                                                                                                                                                                                                                                                                                                                                                          |
| Total_Gen_Sales_Tax    | T09                                                                                                                                                                                                                                                                                                                                                                                                                                                                                                                                                                  |
| Total_Select_Sales_Tax | T10, T11, T12, T13, T14, T15, T16, T19                                                                                                                                                                                                                                                                                                                                                                                                                                                                                                                               |
| Alcoholic_Beverage_Tax | T10                                                                                                                                                                                                                                                                                                                                                                                                                                                                                                                                                                  |

|                             |                                                                                                                                                                                                   |
|-----------------------------|---------------------------------------------------------------------------------------------------------------------------------------------------------------------------------------------------|
| Amusement_Tax               | T11                                                                                                                                                                                               |
| Insurance_Premium_Tax       | T12                                                                                                                                                                                               |
| Motor_Fuels_Tax             | T13                                                                                                                                                                                               |
| Pari_mutuels_Tax            | T14                                                                                                                                                                                               |
| Public_Utility_Tax          | T15                                                                                                                                                                                               |
| Tobacco_Tax                 | T16                                                                                                                                                                                               |
| Other_Select_Sales_Tax      | T19                                                                                                                                                                                               |
| Total_License_Taxes         | T20 , T21 , T22 , T23 , T24 , T25 , T27 , T28 , T29                                                                                                                                               |
| Alcoholic_Beverage_Lic      | T20                                                                                                                                                                                               |
| Amusement_License           | T21                                                                                                                                                                                               |
| Corporation_License         | T22                                                                                                                                                                                               |
| Hunting___Fishing_License   | T23                                                                                                                                                                                               |
| Motor_Vehicle_License       | T24                                                                                                                                                                                               |
| Motor_Veh_Oper_License      | T25                                                                                                                                                                                               |
| Motor_Vehicle_License_Total | T24, T25                                                                                                                                                                                          |
| Public_Utility_License      | T27                                                                                                                                                                                               |
| Occup_and_Bus_Lic_NEC       | T28                                                                                                                                                                                               |
| Other_License_Taxes         | T29                                                                                                                                                                                               |
| Total_Income_Taxes          | T40 , T41 , T50 , T51 , T53 , T99                                                                                                                                                                 |
| Individual_Income_Tax       | T40                                                                                                                                                                                               |
| Corp_Net_Income_Tax         | T41                                                                                                                                                                                               |
| Death_and_Gift_Tax          | T50                                                                                                                                                                                               |
| Docum_and_Stock_Tr_Tax      | T51                                                                                                                                                                                               |
| Severance_Tax               | T53                                                                                                                                                                                               |
| Taxes_NEC                   | T99                                                                                                                                                                                               |
| Total_IG_Revenue            | B01, B21, B22, B30, B42, B46, B50, B59, B79, B80, B89, B91, B92, B93, B94, C21, C30, C42, C46, C50, C79, C80, C89, C91, C92, C93, C94, D21, D30, D42, D46, D50, D79, D80, D89, D91, D92, D93, D94 |
| Total_Fed_IG_Revenue        | B01, B21, B22, B30, B42, B46, B50, B59, B79, B80, B89, B91, B92, B93, B94                                                                                                                         |
| Fed_IGR_Air_Transport       | B01                                                                                                                                                                                               |
| Fed_IGR_Education           | B21                                                                                                                                                                                               |
| Fed_IGR_Emp_Sec_Adm         | B22                                                                                                                                                                                               |
| Fed_IGR_Gen_Rev_Shar        | .                                                                                                                                                                                                 |
| Fed_IGR_Gen_Support         | B30                                                                                                                                                                                               |
| Fed_IGR_Health___Hos        | B42                                                                                                                                                                                               |
| Fed_IGR_Highways            | B46                                                                                                                                                                                               |
| Fed_IGR_Transit_Sub         | B94                                                                                                                                                                                               |
| Fed_IGR_Hous_Com_Dev        | B50                                                                                                                                                                                               |
| Fed_IGR_Natural_Res         | B59                                                                                                                                                                                               |
| Fed_IGR_Public_Welf         | B79                                                                                                                                                                                               |
| Fed_IGR_Sewerage            | B80                                                                                                                                                                                               |
| Fed_IGR_Other               | B89                                                                                                                                                                                               |
| Total_State_IG_Revenue      | C21, C30, C42, C46, C50, C79, C80, C89, C91, C92, C93, C94                                                                                                                                        |
| State_IGR_Education         | C21                                                                                                                                                                                               |
| State_IGR_Tax_Relief        | .                                                                                                                                                                                                 |
| State_IGR_Oth_Gen_Sup       | C30                                                                                                                                                                                               |
| State_IGR_Gen_Sup           | State_IGR_Oth_Gen_Sup, State_IGR_Tax_Relief                                                                                                                                                       |
| State_IGR_Health___Hos      | C42                                                                                                                                                                                               |
| State_IGR_Highways          | C46                                                                                                                                                                                               |

|                           |                                                                                                                                                      |
|---------------------------|------------------------------------------------------------------------------------------------------------------------------------------------------|
| State_IGR_Transit_Sub     | C94                                                                                                                                                  |
| State_IGR_Hous_Com_Dev    | C50                                                                                                                                                  |
| State_IGR_Public_Welf     | C79                                                                                                                                                  |
| State_IGR_Sewerage        | C80                                                                                                                                                  |
| State_IGR_Other           | C89                                                                                                                                                  |
| Tot_Local_IG_Rev          | D21, D30, D42, D46, D50, D79, D80, D89, D91, D92, D93, D94                                                                                           |
| Local_IGR_InterSchool_Aid | D11                                                                                                                                                  |
| Local_IGR_Other_Education | D21                                                                                                                                                  |
| Local_IGR_Oth_Gen_Sup     | D30                                                                                                                                                  |
| Local_IGR_Health___Hos    | D42                                                                                                                                                  |
| Local_IGR_Highways        | D46                                                                                                                                                  |
| Local_IGR_Transit_Sub     | D94                                                                                                                                                  |
| Local_IGR_Hous_Com_Dev    | D50                                                                                                                                                  |
| Local_IGR_Public_Welf     | D79                                                                                                                                                  |
| Local_IGR_Sewerage        | D80                                                                                                                                                  |
| Local_IGR_Other           | D89                                                                                                                                                  |
| Tot_Chgs_and_Misc_Rev     | A01, A03, A09, A10, A12, A16, A18, A21, A36, A44, A45, A50, A56, A59, A60, A61, A80, A81, A87, A89, U01, U11, U20, U21, U30, U40, U41, U50, U95, U99 |
| Total_General_Charges     | A01, A03, A09, A10, A12, A16, A18, A21, A36, A44, A45, A50, A56, A59, A60, A61, A80, A81, A87, A89                                                   |
| Chg_Air_Transportation    | A01                                                                                                                                                  |
| Chg_Misc_Com_Activ        | A03                                                                                                                                                  |
| Chg_Total_Education       | A09, A10, A12, A16, A18, A21                                                                                                                         |
| Chg_Total_Elem_Education  | Chg_Elem_Ed_Sch_Lunch, Chg_Elem_Ed_Tuition, Chg_Elem_Ed_NEC                                                                                          |
| Chg_Elem_Ed_Sch_Lunch     | A09                                                                                                                                                  |
| Chg_Elem_Ed_Tuition       | A10                                                                                                                                                  |
| Chg_Elem_Ed_NEC           | A12                                                                                                                                                  |
| Chg_Total_High_Ed         | A16, A18                                                                                                                                             |
| Chg_Hospitals             | A36                                                                                                                                                  |
| Chg_Highways              | Chg_Regular_Highways, Chg_Toll_Highways                                                                                                              |
| Chg_Regular_Highways      | A44                                                                                                                                                  |
| Chg_Toll_Highways         | A45                                                                                                                                                  |
| Chg_Housing___Comm_Dev    | A50                                                                                                                                                  |
| Chg_Total_Nat_Res         | A56 , A59                                                                                                                                            |
| Chg_Parking               | A60                                                                                                                                                  |
| Chg_Parks___Recreation    | A61                                                                                                                                                  |
| Chg_Sewerage              | A80                                                                                                                                                  |
| Chg_Solid_Waste_Mgmt      | A81                                                                                                                                                  |
| Chg_Water_Transport       | A87                                                                                                                                                  |
| Chg_All_Other_NEC         | A89                                                                                                                                                  |
| Misc_General_Revenue      | U01, U11, U20, U21, U30, U40, U41, U50, U95, U99                                                                                                     |
| Special_Assessments       | U01                                                                                                                                                  |
| Prop_Sale_Total           | Prop_Sale_Hous_Com_Dev, Prop_Sale_Other                                                                                                              |
| Prop_Sale_Hous_Com_Dev    | .                                                                                                                                                    |
| Prop_Sale_Other           | U11                                                                                                                                                  |
| Interest_Revenue          | U20                                                                                                                                                  |
| Fines_and_Forfeits        | U30                                                                                                                                                  |
| Rents_and_Royalties       | U40 , U41                                                                                                                                            |

|                        |                                                                                                                                                                                                                                                                                                                                                                                                                                                                                                                                                                                                                                                                                                                                                                                                                                                                                                                                                                                                                                                            |
|------------------------|------------------------------------------------------------------------------------------------------------------------------------------------------------------------------------------------------------------------------------------------------------------------------------------------------------------------------------------------------------------------------------------------------------------------------------------------------------------------------------------------------------------------------------------------------------------------------------------------------------------------------------------------------------------------------------------------------------------------------------------------------------------------------------------------------------------------------------------------------------------------------------------------------------------------------------------------------------------------------------------------------------------------------------------------------------|
| Net_Lottery_Revenue    | U95                                                                                                                                                                                                                                                                                                                                                                                                                                                                                                                                                                                                                                                                                                                                                                                                                                                                                                                                                                                                                                                        |
| Misc_General_Rev_NEC   | U99                                                                                                                                                                                                                                                                                                                                                                                                                                                                                                                                                                                                                                                                                                                                                                                                                                                                                                                                                                                                                                                        |
| Liquor_Stores_Revenue  | A90                                                                                                                                                                                                                                                                                                                                                                                                                                                                                                                                                                                                                                                                                                                                                                                                                                                                                                                                                                                                                                                        |
| Total_Utility_Revenue  | A91, A92, A93, A94                                                                                                                                                                                                                                                                                                                                                                                                                                                                                                                                                                                                                                                                                                                                                                                                                                                                                                                                                                                                                                         |
| Water_Utility_Revenue  | A91                                                                                                                                                                                                                                                                                                                                                                                                                                                                                                                                                                                                                                                                                                                                                                                                                                                                                                                                                                                                                                                        |
| Electric_Utility_Rev   | A92                                                                                                                                                                                                                                                                                                                                                                                                                                                                                                                                                                                                                                                                                                                                                                                                                                                                                                                                                                                                                                                        |
| Gas_Utility_Rev        | A93                                                                                                                                                                                                                                                                                                                                                                                                                                                                                                                                                                                                                                                                                                                                                                                                                                                                                                                                                                                                                                                        |
| Transit_Utility_Rev    | A94                                                                                                                                                                                                                                                                                                                                                                                                                                                                                                                                                                                                                                                                                                                                                                                                                                                                                                                                                                                                                                                        |
| Total_Insur_Trust_Rev  | X01, X02, X05, X08, Y01, Y02, Y04, Y11, Y12, Y51, Y52                                                                                                                                                                                                                                                                                                                                                                                                                                                                                                                                                                                                                                                                                                                                                                                                                                                                                                                                                                                                      |
| Total_Insur_Trust_Ctrb | X01, X02, X05, Y01                                                                                                                                                                                                                                                                                                                                                                                                                                                                                                                                                                                                                                                                                                                                                                                                                                                                                                                                                                                                                                         |
| Tot_Ins_Trust_Inv_Rev  | X08 , Y02                                                                                                                                                                                                                                                                                                                                                                                                                                                                                                                                                                                                                                                                                                                                                                                                                                                                                                                                                                                                                                                  |
| Total_Emp_Ret_Rev      | X01, X02, X05, X08                                                                                                                                                                                                                                                                                                                                                                                                                                                                                                                                                                                                                                                                                                                                                                                                                                                                                                                                                                                                                                         |
| Emp_Ret_Total_Ctrib    | X01, X02, X05                                                                                                                                                                                                                                                                                                                                                                                                                                                                                                                                                                                                                                                                                                                                                                                                                                                                                                                                                                                                                                              |
| Emp_Ret_Loc_Emp_Ctrib  | X01                                                                                                                                                                                                                                                                                                                                                                                                                                                                                                                                                                                                                                                                                                                                                                                                                                                                                                                                                                                                                                                        |
| Emp_Ret_Loc_To_Loc_Sys | X04                                                                                                                                                                                                                                                                                                                                                                                                                                                                                                                                                                                                                                                                                                                                                                                                                                                                                                                                                                                                                                                        |
| Emp_Ret_From_Other_Gov | X05                                                                                                                                                                                                                                                                                                                                                                                                                                                                                                                                                                                                                                                                                                                                                                                                                                                                                                                                                                                                                                                        |
| Emp_Ret_Sta_To_Sta_Ctr | X06                                                                                                                                                                                                                                                                                                                                                                                                                                                                                                                                                                                                                                                                                                                                                                                                                                                                                                                                                                                                                                                        |
| Emp_Ret_Int_Rev        | X08                                                                                                                                                                                                                                                                                                                                                                                                                                                                                                                                                                                                                                                                                                                                                                                                                                                                                                                                                                                                                                                        |
| Emp_Ret_Other_Earnings | .                                                                                                                                                                                                                                                                                                                                                                                                                                                                                                                                                                                                                                                                                                                                                                                                                                                                                                                                                                                                                                                          |
| Total_Unemp_Rev        | Y01, Y02, Y04                                                                                                                                                                                                                                                                                                                                                                                                                                                                                                                                                                                                                                                                                                                                                                                                                                                                                                                                                                                                                                              |
| Unemp_Payroll_Tax      | Y01                                                                                                                                                                                                                                                                                                                                                                                                                                                                                                                                                                                                                                                                                                                                                                                                                                                                                                                                                                                                                                                        |
| Unemp_Int_Revenue      | Y02                                                                                                                                                                                                                                                                                                                                                                                                                                                                                                                                                                                                                                                                                                                                                                                                                                                                                                                                                                                                                                                        |
| Unemp_Federal_Advances | Y04                                                                                                                                                                                                                                                                                                                                                                                                                                                                                                                                                                                                                                                                                                                                                                                                                                                                                                                                                                                                                                                        |
| Total_Expenditure      | E01, E03, E04, E05, E12, E16, E18, E21, E22, E23, E24, E25, E26, E29, E31, E32, E36, E44, E44, E45, E50, E52, E55, E56, E59, E60, E61, E62, E66, E74, E75, E77, E79, E80, E81, E85, E87, E89, E90, E91, E92, E93, E94, I89, I91, I92, I93, I94, J19, J67, J68, J85, X11, X12, Y05, Y06, Y14, Y53, F01, F03, F04, F05, F12, F16, F18, F21, F22, F23, F24, F25, F26, F29, F31, F32, F36, F44, F45, F50, F52, F55, F56, F59, F60, F61, F62, F66, F77, F79, F80, F81, F85, F87, F89, F90, F91, F92, F93, F94, G01, G03, G04, G05, G12, G16, G18, G21, G22, G23, G24, G25, G26, G29, G31, G32, G36, G44, G45, G50, G52, G55, G56, G59, G60, G61, G62, G66, G77, G79, G80, G81, G85, G87, G89, G90, G91, G92, G93, G94, L01, L04, L05, L12, L18, L23, L25, L29, L32, L36, L44, L52, L59, L60, L61, L62, L66, L67, L79, L80, L81, L87, L89, L91, L92, L93, L94, M01, M04, M05, M12, M18, M21, M23, M24, M25, M29, M30, M32, M36, M44, M50, M52, M55, M56, M59, M60, M61, M62, M66, M67, M68, M79, M80, M81, M87, M89, M91, M92, M93, M94, Q12, Q18, S67, S74, S89 |
| Total_IG_Expenditure   | L01, L04, L05, L12, L18, L23, L25, L29, L32, L36, L44, L50, L52, L59, L60, L61, L62, L66, L67, L79, L80, L81, L87, L89, L91, L92, L93, L94, M01, M04, M05, M12, M18, M21, M23, M24, M25, M29, M30, M32, M36, M44, M50, M52, M52, M55, M56, M59, M60, M61, M62, M66, M67, M68, M79, M80, M81, M87, M89, M91, M92, M93, M94, Q12, Q18, S67, S89                                                                                                                                                                                                                                                                                                                                                                                                                                                                                                                                                                                                                                                                                                              |
| Direct_Expenditure     | E01, E03, E04, E05, E12, E16, E18, E21, E22, E23, E24, E25, E26, E29, E31, E32, E36, E44, E45, E50, E52, E55, E56, E59, E60, E61, E62, E66, E74, E75, E77, E79, E80, E81, E85, E87, E89, E90, E91, E92, E93, E94, F01, F03, F04, F05, F12, F16,                                                                                                                                                                                                                                                                                                                                                                                                                                                                                                                                                                                                                                                                                                                                                                                                            |

|                             |                                                                                                                                                                                                                                                                                                                                                                                                                                                                                                                                                                                                                                                                                                             |
|-----------------------------|-------------------------------------------------------------------------------------------------------------------------------------------------------------------------------------------------------------------------------------------------------------------------------------------------------------------------------------------------------------------------------------------------------------------------------------------------------------------------------------------------------------------------------------------------------------------------------------------------------------------------------------------------------------------------------------------------------------|
|                             | F18, F21, F22, F23, F24, F25, F26, F29, F31, F32, F36, F44, F45, F50, F52, F55, F56, F59, F60, F61, F62, F66, F77, F79, F80, F81, F85, F87, F89, F90, F91, F92, F93, F94, G01, G03, G04, G05, G12, G16, G18, G21, G22, G23, G24, G25, G26, G29, G31, G32, G36, G44, G45, G50, G52, G55, G56, G59, G60, G61, G62, G66, G77, G79, G80, G81, G85, G87, G89, G90, G91, G92, G93, G94, X11, X12, Y05, Y06, Y14, Y53, J19, J67, J68, J85, I89, I91, I92, I93, I94                                                                                                                                                                                                                                                 |
| Total_Current_Expended      | Total_Expenditure, - Total_Capital_Outlays                                                                                                                                                                                                                                                                                                                                                                                                                                                                                                                                                                                                                                                                  |
| Total_Current_Oper          | E01, E03, E04, E05, E12, E16, E18, E21, E22, E23, E24, E25, E26, E29, E31, E32, E36, E44, E45, E50, E52, E55, E56, E59, E60, E61, E62, E66, E74, E75, E77, E79, E80, E81, E85, E87, E89, E90, E91, E92, E93, E94                                                                                                                                                                                                                                                                                                                                                                                                                                                                                            |
| Total_Capital_Outlays       | F01, F03, F04, F05, F12, F16, F18, F21, F22, F23, F24, F25, F26, F29, F31, F32, F36, F44, F45, F50, F52, F55, F56, F59, F60, F61, F62, F66, F77, F79, F80, F81, F85, F87, F89, F90, F91, F92, F93, F94, G01, G03, G04, G05, G12, G16, G18, G21, G22, G23, G24, G25, G26, G29, G31, G32, G36, G44, G45, G50, G52, G55, G56, G59, G60, G61, G62, G66, G77, G79, G80, G81, G85, G87, G89, G90, G91, G92, G93, G94                                                                                                                                                                                                                                                                                              |
| Total_Construction          | F01, F03, F04, F05, F12, F16, F18, F21, F22, F23, F24, F25, F26, F29, F31, F32, F36, F44, F45, F50, F52, F55, F56, F59, F60, F61, F62, F66, F77, F79, F80, F81, F85, F87, F89, F90, F91, F92, F93, F94                                                                                                                                                                                                                                                                                                                                                                                                                                                                                                      |
| Total_Other_Capital_Outlays | Total_Capital_Outlays, -Total_Construction                                                                                                                                                                                                                                                                                                                                                                                                                                                                                                                                                                                                                                                                  |
| Tot_Assist___Subsidies      | J19, J67, J68, J85                                                                                                                                                                                                                                                                                                                                                                                                                                                                                                                                                                                                                                                                                          |
| Total_Interest_on_Debt      | I89, I91, I92, I93, I94                                                                                                                                                                                                                                                                                                                                                                                                                                                                                                                                                                                                                                                                                     |
| Total_Insur_Trust_Ben       | X11, X12, Y05, Y06, Y14, Y53                                                                                                                                                                                                                                                                                                                                                                                                                                                                                                                                                                                                                                                                                |
| Total_Salaries___Wages      | Z00                                                                                                                                                                                                                                                                                                                                                                                                                                                                                                                                                                                                                                                                                                         |
| General_Expenditure         | E01, E03, E04, E05, E12, E16, E18, E21, E22, E23, E24, E25, E26, E29, E31, E32, E36, E44, E45, E50, E52, E55, E56, E59, E60, E61, E62, E66, E74, E75, E77, E79, E80, E81, E85, E87, E89, E90, E91, E92, E93, E94, F01, F03, F04, F05, F12, F16, F18, F21, F22, F23, F24, F25, F26, F29, F31, F32, F36, F44, F45, F50, F52, F55, F56, F59, F60, F61, F62, F66, F77, F79, F80, F81, F85, F87, F89, F90, F91, F92, F93, F94, G01, G03, G04, G05, G12, G16, G18, G21, G22, G23, G24, G25, G26, G29, G31, G32, G36, G44, G45, G50, G52, G55, G56, G59, G60, G61, G62, G66, G77, G79, G80, G81, G85, G87, G89, G90, G91, G92, G93, G94, X11, X12, Y05, Y06, Y14, Y53, J19, J67, J68, J85, I89, I91, I92, I93, I94 |
| IG_Exp_To_State_Govt        | L01, L04, L05, L12, L18, L23, L25, L29, L32, L36, L44, L50, L52, L59, L60, L61, L62, L66, L67, L79, L80, L81, L87, L89, L91, L92, L93, L94                                                                                                                                                                                                                                                                                                                                                                                                                                                                                                                                                                  |
| IG_Exp_To_Local_Govts       | M01, M04, M05, M12, M18, M21, M23, M24, M25, M29, M30, M32, M36, M44, M50, M52, M52, M55, M56, M59, M60, M61, M62, M66, M67, M68, M79, M80, M81, M87, M89, M91, M92, M93, M94                                                                                                                                                                                                                                                                                                                                                                                                                                                                                                                               |
| IG_Exp_To_Federal_Govt      | S67, S74, S89                                                                                                                                                                                                                                                                                                                                                                                                                                                                                                                                                                                                                                                                                               |
| Direct_General_Expended     | E01, E03, E04, E05, E12, E16, E18, E21, E22, E23, E24, E25, E26, E29, E31, E32, E36, E44, E45, E50, E52, E55, E56, E59,                                                                                                                                                                                                                                                                                                                                                                                                                                                                                                                                                                                     |

|                              |                                                                                                                                                                                                                                                                                                                                                                                                                                                                                                                                                                                     |
|------------------------------|-------------------------------------------------------------------------------------------------------------------------------------------------------------------------------------------------------------------------------------------------------------------------------------------------------------------------------------------------------------------------------------------------------------------------------------------------------------------------------------------------------------------------------------------------------------------------------------|
|                              | E60, E61, E62, E66, E74, E75, E77, E79, E80, E81, E85, E87, E89, E90, E91, E92, E93, E94, F01, F03, F04, F05, F12, F16, F18, F21, F22, F23, F24, F25, F26, F29, F31, F32, F36, F44, F45, F50, F52, F55, F56, F59, F60, F61, F62, F66, F77, F79, F80, F81, F85, F87, F89, F90, F91, F92, F93, F94, G01, G03, G04, G05, G12, G16, G18, G21, G22, G23, G24, G25, G26, G29, G31, G32, G36, G44, G45, G50, G52, G55, G56, G59, G60, G61, G62, G66, G77, G79, G80, G81, G85, G87, G89, G90, G91, G92, G93, G94, X11, X12, Y05, Y06, Y14, Y53, J19, J67, J68, J85, I89, I91, I92, I93, I94 |
| General_Current_Expend       | General_Expenditure, - General_Capital_Outlay                                                                                                                                                                                                                                                                                                                                                                                                                                                                                                                                       |
| General_Current_Oper         | E01, E03, E04, E05, E12, E16, E18, E21, E22, E23, E24, E25, E26, E29, E31, E32, E36, E44, E45, E50, E52, E55, E56, E59, E60, E61, E62, E66, E74, E75, E77, E79, E80, E81, E85, E87, E89, E90, E91, E92, E93, E94                                                                                                                                                                                                                                                                                                                                                                    |
| General_Capital_Outlay       | F01, F03, F04, F05, F12, F16, F18, F21, F22, F23, F24, F25, F26, F29, F31, F32, F36, F44, F45, F50, F52, F55, F56, F59, F60, F61, F62, F66, F77, F79, F80, F81, F85, F87, F89, G01, G03, G04, G05, G12, G16, G18, G21, G22, G23, G24, G25, G26, G29, G31, G32, G36, G44, G45, G50, G52, G55, G56, G59, G60, G61, G62, G66, G77, G79, G80, G81, G85, G87, G89                                                                                                                                                                                                                        |
| General_Construction         | F01, F03, F04, F05, F12, F16, F18, F21, F22, F23, F24, F25, F26, F29, F31, F32, F36, F44, F45, F50, F52, F55, F56, F59, F60, F61, F62, F66, F77, F79, F80, F81, F85, F87, F89, F90, F91, F92, F93, F94                                                                                                                                                                                                                                                                                                                                                                              |
| General_Capital_Outlay_Other | General_Capital_Outlay, -General_Construction                                                                                                                                                                                                                                                                                                                                                                                                                                                                                                                                       |
| General_Assist___Sub         | Tot_Assist___Subsidies                                                                                                                                                                                                                                                                                                                                                                                                                                                                                                                                                              |
| General_Debt_Interest        | I89                                                                                                                                                                                                                                                                                                                                                                                                                                                                                                                                                                                 |
| Air_Trans_Total_Expend       | E01 , F01 , G01 , L01 , M01                                                                                                                                                                                                                                                                                                                                                                                                                                                                                                                                                         |
| Air_Trans_Direct_Expend      | E01 , F01 , G01                                                                                                                                                                                                                                                                                                                                                                                                                                                                                                                                                                     |
| Air_Trans_Cap_Outlay         | F01 , G01                                                                                                                                                                                                                                                                                                                                                                                                                                                                                                                                                                           |
| Air_Trans_Current_Exp        | Air_Trans_Direct_Expend, -Air_Trans_Cap_Outlay                                                                                                                                                                                                                                                                                                                                                                                                                                                                                                                                      |
| Air_Trans_Construction       | F01                                                                                                                                                                                                                                                                                                                                                                                                                                                                                                                                                                                 |
| Air_Trans_IG_To_State        | L01                                                                                                                                                                                                                                                                                                                                                                                                                                                                                                                                                                                 |
| Air_Trans_IG_Local_Govts     | M01                                                                                                                                                                                                                                                                                                                                                                                                                                                                                                                                                                                 |
| Misc_Com_Activ_Tot_Exp       | E03 , F03 , G03                                                                                                                                                                                                                                                                                                                                                                                                                                                                                                                                                                     |
| Misc_Com_Activ_Cap_Out       | F03 , G03                                                                                                                                                                                                                                                                                                                                                                                                                                                                                                                                                                           |
| Misc_Com_Activ_Current_Exp   | Misc_Com_Activ_Tot_Exp, -Misc_Com_Activ_Cap_Out                                                                                                                                                                                                                                                                                                                                                                                                                                                                                                                                     |
| Misc_Com_Activ_Constr        | F03                                                                                                                                                                                                                                                                                                                                                                                                                                                                                                                                                                                 |
| Correct_Total_Exp            | E04 , F04 , G04 , E05 , F05 , G05 , L04 , L05 , M04 , M05                                                                                                                                                                                                                                                                                                                                                                                                                                                                                                                           |
| Correct_Direct_Exp           | E04 , E05 , F04 , G04 , F05 , G05                                                                                                                                                                                                                                                                                                                                                                                                                                                                                                                                                   |
| Correct_Cap_Outlay           | F04 , G04 , F05 , G05                                                                                                                                                                                                                                                                                                                                                                                                                                                                                                                                                               |
| Correct_Current_Exp          | Correct_Direct_Exp, -Correct_Cap_Outlay                                                                                                                                                                                                                                                                                                                                                                                                                                                                                                                                             |
| Correct_Construct            | F04 , F05                                                                                                                                                                                                                                                                                                                                                                                                                                                                                                                                                                           |
| Correct_IG_To_St             | L04 , L05                                                                                                                                                                                                                                                                                                                                                                                                                                                                                                                                                                           |
| Correct_IG_Loc_Govts         | M04 , M05                                                                                                                                                                                                                                                                                                                                                                                                                                                                                                                                                                           |
| Total_Educ_Total_Exp         | E12, F12, G12, E16, F16, G16, E18, F18, G18, J19, E21, F21, G21, L12, M12, Q12, L18, M18, L21, M21                                                                                                                                                                                                                                                                                                                                                                                                                                                                                  |
| Total_Educ_Direct_Exp        | E12, F12, G12, E16, F16, G16, E18, F18, G18, J19, E21, F21, G21                                                                                                                                                                                                                                                                                                                                                                                                                                                                                                                     |

|                          |                                                 |
|--------------------------|-------------------------------------------------|
| Total_Educ_Assist___Sub  | J19                                             |
| Total_Educ_Cap_Outlay    | F12, F16, F18, F21, G12, G16, G18, G21          |
| Total_Educ_Current_Exp   | Total_Educ_Direct_Exp, -Total_Educ_Cap_Outlay   |
| Total_Educ_Construct     | F12 , F16 , F18 , F21                           |
| Elem_Educ_Total_Exp      | E12, F12, G12, L12, M12, Q12                    |
| Elem_Educ_Direct_Exp     | E12, F12, G12                                   |
| Elem_Educ_Cap_Outlay     | F12, G12                                        |
| Elem_Educ_Current_Exp    | Elem_Educ_Direct_Exp, -Elem_Educ_Cap_Outlay     |
| Elem_Educ_Construction   | F12                                             |
| Elem_Educ_IG_To_State    | L12                                             |
| Elem_Educ_IG_Local_Govts | M12                                             |
| Elem_Educ_IG_Sch_to_Sch  | Q12                                             |
| Higher_Ed_Total_Exp      | E16, E18, F16, F18, G16, G18, L18, M18          |
| Higher_Ed_Direct_Exp     | E16, E18, F16, F18, G16, G18                    |
| Higher_Ed_Cap_Outlay     | F16, F18, G16, G18                              |
| Higher_Ed_Current_Exp    | Higher_Ed_Direct_Exp, -Higher_Ed_Cap_Outlay     |
| Higher_Ed_Construct      | F16, F18                                        |
| Higher_Ed_IG_To_St       | L18                                             |
| Higher_Ed_IG_Loc_Govts   | M18                                             |
| Educ_NEC_Total_Expend    | E21, F21, G21, L21, M21                         |
| Educ_NEC_Direct_Expend   | E21, F21, G21                                   |
| Educ_NEC_Assistance      | .                                               |
| Educ_NEC_Cap_Outlay      | F21, G21                                        |
| Educ_NEC_Current_Exp     | Educ_NEC_Direct_Expend, -Educ_NEC_Cap_Outlay    |
| Educ_NEC_Construction    | F21                                             |
| Educ_NEC_IG_To_State     | L21                                             |
| Educ_NEC_IG_Local_Govts  | M21                                             |
| Emp_Sec_Adm_Direct_Exp   | E22 , F22 , G22                                 |
| Emp_Sec_Adm_Cap_Outlay   | F22 , G22                                       |
| Emp_Sec_Adm_Current_Exp  | Emp_Sec_Adm_Direct_Exp, -Emp_Sec_Adm_Cap_Outlay |
| Emp_Sec_Adm_Construct    | F22                                             |
| Fin_Admin_Total_Exp      | E23, F23, G23, L23, M23                         |
| Fin_Admin_Direct_Exp     | E23, F23, G23                                   |
| Fin_Admin_Cap_Outlay     | F23, G23                                        |
| Fin_Admin_Current_Exp    | Fin_Admin_Direct_Exp, -Fin_Admin_Cap_Outlay     |
| Fin_Admin_Construction   | F23                                             |
| Fin_Admin_IG_To_State    | L23                                             |
| Fin_Admin_IG_Local_Govts | M23                                             |
| Fire_Prot_Total_Expend   | E24, F24, G24, L24, M24                         |
| Fire_Prot_Direct_Exp     | E24, F24, G24                                   |
| Fire_Prot_Cap_Outlay     | F24, G24                                        |
| Fire_Prot_Current_Exp    | Fire_Prot_Direct_Exp, -Fire_Prot_Cap_Outlay     |
| Fire_Prot_Construction   | F24                                             |
| Fire_Prot_IG_To_State    | L24                                             |
| Fire_Prot_IG_Local_Govts | M24                                             |
| Judicial_Total_Expend    | E25, F25, G25, L25, M25                         |
| Judicial_Direct_Expend   | E25, F25, G25                                   |
| Judicial_Cap_Outlay      | F25, G25                                        |
| Judicial_Current_Exp     | Judicial_Direct_Expend, -Judicial_Cap_Outlay    |
| Judicial_Construction    | F25                                             |
| Judicial_IG_To_State     | L25                                             |

|                             |                                                 |
|-----------------------------|-------------------------------------------------|
| Judicial_IG_Local_Govts     | M25                                             |
| Cen_Staff_Total_Expend      | E29, F29, G29, L29, M29                         |
| Cen_Staff_Direct_Exp        | E29, F29, G29                                   |
| Cen_Staff_Cap_Outlay        | F29, G29                                        |
| Cen_Staff_Current_Exp       | Cen_Staff_Direct_Exp, -Cen_Staff_Cap_Outlay     |
| Cen_Staff_Construction      | F29                                             |
| Cen_Staff_IG_To_State       | L29                                             |
| Cen_Staff_IG_Local_Govts    | M29                                             |
| Gen_Pub_Bldg_Total_Exp      | E31, F31, G31                                   |
| Gen_Pub_Bldg_Cap_Out        | F31, G31                                        |
| Gen_Pub_Bldg_Current_Exp    | Gen_Pub_Bldg_Total_Exp, -Gen_Pub_Bldg_Cap_Out   |
| Gen_Pub_Bldg_Construct      | F31                                             |
| Health_Total_Expend         | E32, F32, G32, L32, M32                         |
| Health_Direct_Expend        | E32, F32, G32                                   |
| Health_Capital_Outlay       | F32, G32                                        |
| Health_Current_Exp          | Health_Direct_Expend, -Health_Capital_Outlay    |
| Health_Construction         | F32                                             |
| Health_IG_To_State          | L32                                             |
| Health_IG_Local_Govts       | M32                                             |
| Total_Hospital_Total_Exp    | E36, F36, G36, L36, M36                         |
| Total_Hospital_Dir_Exp      | E36, F36, G36                                   |
| Total_Hospital_Cap_Out      | F36, G36                                        |
| Total_Hospital_Current_Exp  | Total_Hospital_Dir_Exp, -Total_Hospital_Cap_Out |
| Total_Hospital_Construct    | F36                                             |
| Total_Hospital_IG_To_State  | L36                                             |
| Total_Hospital_IG_Loc_Govts | M36                                             |
| Own_Hospital_Total_Exp      | E37, F37, G37                                   |
| Own_Hospital_Cap_Out        | F37, G37                                        |
| Own_Hospital_Current_Exp    | Own_Hospital_Total_Exp, -Own_Hospital_Cap_Out   |
| Own_Hospital_Construct      | F37                                             |
| Hosp_Other_Total_Exp        | E39, F39, G39, L39, M39                         |
| Hosp_Other_Direct_Exp       | E39, F39, G39                                   |
| Hosp_Other_Cap_Outlay       | F39, G39                                        |
| Hosp_Other_Current_Exp      | Hosp_Other_Direct_Exp, -Hosp_Other_Cap_Outlay   |
| Hosp_Other_Construct        | F39                                             |
| Hosp_Other_IG_To_State      | L39                                             |
| Hosp_Other_IG_Loc_Govts     | M39                                             |
| Total_Highways_Tot_Exp      | E44, F44, G44, E45, F45, G45, L44, M44          |
| Total_Highways_Dir_Exp      | E44, F44, G44, E45, F45, G45                    |
| Total_Highways_Cap_Out      | F44, G44, F45, G45                              |
| Total_Highways_Current_Exp  | Total_Highways_Dir_Exp, -Total_Highways_Cap_Out |
| Total_Highways_Construct    | F44, F45                                        |
| Regular_Hwy_Total_Exp       | E44, F44, G44, L44, M44                         |
| Regular_Hwy_Direct_Exp      | E44, F44, G44                                   |
| Regular_Hwy_Cap_Outlay      | F44, G44                                        |
| Regular_Hwy_Current_Exp     | Regular_Hwy_Direct_Exp, -Regular_Hwy_Cap_Outlay |
| Regular_Hwy_Construct       | F44                                             |
| Regular_Hwy_IG_To_Sta       | L44                                             |
| Regular_Hwy_IG_Loc_Govts    | M44                                             |
| Toll_Hwy_Total_Expend       | E45, F45, G45                                   |
| Toll_Hwy_Cap_Outlay         | F45, G45                                        |

|                          |                                                                 |
|--------------------------|-----------------------------------------------------------------|
| Toll_Hwy_Current_Exp     | Toll_Hwy_Total_Expend, -Toll_Hwy_Cap_Outlay                     |
| Toll_Hwy_Construction    | F45                                                             |
| Transit_Sub_Total_Exp    | .                                                               |
| Transit_Sub_Direct_Sub   | .                                                               |
| Transit_Sub_IG_To_Sta    | .                                                               |
| Transit_Sub_IG_Loc_Govts | .                                                               |
| Transit_Sub_To_Own_Sys   | .                                                               |
| Hous___Com_Total_Exp     | E50, F50, G50, L50, M50                                         |
| Hous___Com_Direct_Exp    | E50, F50, G50                                                   |
| Hous___Com_Cap_Outlay    | F50, G50                                                        |
| Hous___Com_Current_Exp   | Hous___Com_Direct_Exp, -Hous___Com_Cap_Outlay                   |
| Hous___Com_Construct     | F50                                                             |
| Hous___Com_IG_To_State   | L50                                                             |
| Hous___Com_IG_Loc_Govts  | M50                                                             |
| Libraries_Total_Expend   | E52, F52, G52, L52, M52                                         |
| Libraries_Direct_Exp     | E52, F52, G52                                                   |
| Libraries_Cap_Outlay     | F52, G52                                                        |
| Libraries_Current_Exp    | Libraries_Direct_Exp, -Libraries_Cap_Outlay                     |
| Libraries_Construction   | F52                                                             |
| Libraries_IG_To_State    | L52                                                             |
| Libraries_IG_Local_Govts | M52                                                             |
| Natural_Res_Total_Exp    | E55, F55, G55, M55, E56, F56, G56, M56, E59, F59, G59, L59, M59 |
| Natural_Res_Direct_Exp   | E55, F55, G55, E56, F56, G56, E59, F59, G59                     |
| Natural_Res_Cap_Outlay   | F55, G55, F56, G56, F59, G59                                    |
| Natural_Res_Current_Exp  | Natural_Res_Direct_Exp, -Natural_Res_Cap_Outlay                 |
| Natural_Res_Construct    | F55, F56, F59                                                   |
| Natural_Res_IG_To_Sta    | L59                                                             |
| Natural_Res_IG_Loc_Govts | M55, M56, M59                                                   |
| Parking_Total_Expend     | E60, F60, G60, L60, M60                                         |
| Parking_Direct_Expend    | E60, F60, G60                                                   |
| Parking_Capital_Outlay   | F60, G60                                                        |
| Parking_Current_Exp      | Parking_Direct_Expend, -Parking_Capital_Outlay                  |
| Parking_Construction     | F60                                                             |
| Parking_IG_To_State      | L60                                                             |
| Parking_IG_Local_Govts   | M60                                                             |
| Parks___Rec_Total_Exp    | E61, F61, G61, L61, M61                                         |
| Parks___Rec_Direct_Exp   | E61, F61, G61                                                   |
| Parks___Rec_Cap_Outlay   | F61, G61                                                        |
| Parks___Rec_Current_Exp  | Parks___Rec_Direct_Exp, -Parks___Rec_Cap_Outlay                 |
| Parks___Rec_Construct    | F61                                                             |
| Parks___Rec_IG_To_Sta    | L61                                                             |
| Parks___Rec_IG_Loc_Govts | M61                                                             |
| Police_Prot_Total_Exp    | E62, F62, G62, L62, M62                                         |
| Police_Prot_Direct_Exp   | E62, F62, G62                                                   |
| Police_Prot_Cap_Outlay   | F62, G62                                                        |
| Police_Prot_Current_Exp  | Police_Prot_Direct_Exp, -Police_Prot_Cap_Outlay                 |
| Police_Prot_Construct    | F62                                                             |
| Police_Prot_IG_To_Sta    | L62                                                             |
| Police_Prot_IG_Loc_Govts | M62                                                             |
| Prot_Insp_Total_Exp      | E66, F66, G66, L66, M66                                         |

|                          |                                                                                 |
|--------------------------|---------------------------------------------------------------------------------|
| Prot_Insp_Direct_Exp     | E66, F66, G66                                                                   |
| Prot_Insp_Cap_Outlay     | F66, G66                                                                        |
| Prot_Insp_Current_Exp    | Prot_Insp_Direct_Exp, -Prot_Insp_Cap_Outlay                                     |
| Prot_Insp_Construction   | F66                                                                             |
| Prot_Insp_IG_To_State    | L66                                                                             |
| Prot_Insp_IG_Local_Govts | M66                                                                             |
| Public_Welf_Total_Exp    | J67, L67, M67, J68 , M68, E74, E75, S74, E77, F77, G77, E79, F79, G79, L79, M79 |
| Public_Welf_Direct_Exp   | J67, J68 , E74, E75, E77, F77, G77, E79, F79, G79                               |
| Public_Welf_Cash_Asst    | J67, J68, M67, M68                                                              |
| Public_Welf_Cap_Outlay   | F77, G77, F79, G79                                                              |
| Public_Welf_Current_Exp  | Public_Welf_Direct_Exp, -Public_Welf_Cap_Outlay, -Public_Welf_Cash_Asst         |
| Public_Welf_Construct    | F77, F79                                                                        |
| Welf_Categ_Total_Exp     | J67, L67, M67                                                                   |
| Welf_Categ_Cash_Assist   | J67                                                                             |
| Welf_Categ_IG_To_State   | L67                                                                             |
| Welf_Categ_IG_Loc_Govts  | M67                                                                             |
| Welf_Cash_Total_Exp      | J68 , M68                                                                       |
| Welf_Cash_Cash_Assist    | J68                                                                             |
| Welf_Cash_IG_Local_Govts | M68                                                                             |
| Welf_Vend_Pmts_Medical   | E74                                                                             |
| Welf_Vend_Pmts_NEC       | E75                                                                             |
| Welf_State_Share_Part_D  | S74                                                                             |
| Welf_Ins_Total_Exp       | E77, F77, G77                                                                   |
| Welf_Ins_Cap_Outlay      | F77, G77                                                                        |
| Welf_Ins_Current_Exp     | F77                                                                             |
| Welf_Ins_Construction    | E79, F79, G79, L79, M79                                                         |
| Welf_NEC_Total_Expend    | E79, F79, G79                                                                   |
| Welf_NEC_Direct_Expend   | F79, G79                                                                        |
| Welf_NEC_Cap_Outlay      | Welf_NEC_Direct_Expend, -Welf_NEC_Cap_Outlay                                    |
| Welf_NEC_Current_Exp     | F79                                                                             |
| Welf_NEC_Construction    | L79                                                                             |
| Welf_NEC_IG_To_State     | M79                                                                             |
| Welf_NEC_IG_Local_Govts  | E80, F80, G80, L80, M80                                                         |
| Sewerage_Total_Expend    | E80, F80, G80                                                                   |
| Sewerage_Direct_Expend   | F80, G80                                                                        |
| Sewerage_Cap_Outlay      | Sewerage_Direct_Expend, -Sewerage_Cap_Outlay                                    |
| Sewerage_Current_Exp     | F80                                                                             |
| Sewerage_Construction    | L80                                                                             |
| Sewerage_IG_To_State     | M80                                                                             |
| Sewerage_IG_Local_Govts  | E81, F81, G81, L81, M81                                                         |
| SW_Mgmt_Total_Expend     | E81, F81, G81                                                                   |
| SW_Mgmt_Direct_Expend    | F81, G81                                                                        |
| SW_Mgmt_Capital_Outlay   | SW_Mgmt_Direct_Expend, -SW_Mgmt_Capital_Outlay                                  |
| SW_Mgmt_Current_Exp      | F81                                                                             |
| SW_Mgmt_Construction     | L81                                                                             |
| SW_Mgmt_IG_To_State      | M81                                                                             |
| SW_Mgmt_IG_Local_Govts   | E87, F87, G87, L87, M87                                                         |
| Water_Trans_Total_Exp    | E87, F87, G87                                                                   |
| Water_Trans_Direct_Exp   |                                                                                 |

|                           |                                                                                                                           |
|---------------------------|---------------------------------------------------------------------------------------------------------------------------|
| Water_Trans_Cap_Outlay    | F87, G87                                                                                                                  |
| Water_Trans_Current_Exp   | Water_Trans_Direct_Exp, -Water_Trans_Cap_Outlay                                                                           |
| Water_Trans_Construct     | F87                                                                                                                       |
| Water_Trans_IG_To_Sta     | L87                                                                                                                       |
| Water_Trans_IG_Loc_Govts  | M87                                                                                                                       |
| Interest_on_Gen_Debt      | I89                                                                                                                       |
| General_NEC_Total_Exp     | E89, F89, G89, L89, M89, S89, J89                                                                                         |
| General_NEC_Direct_Exp    | E89, F89, G89, J89                                                                                                        |
| VetBonus                  | J89                                                                                                                       |
| General_NEC_Cap_Outlay    | F89, G89                                                                                                                  |
| General_NEC_Current_Exp   | General_NEC_Direct_Exp, -General_NEC_Cap_Outlay, -<br>VetBonus                                                            |
| General_NEC_Construct     | F89                                                                                                                       |
| General_NEC_IG_To_St      | L89                                                                                                                       |
| General_NEC_IG_Loc_Govts  | M89                                                                                                                       |
| General_NEC_IG_To_Fed     | S89                                                                                                                       |
| Liquor_Stores_Tot_Exp     | E90, F90, G90                                                                                                             |
| Liquor_Stores_Cap_Out     | F90, G90                                                                                                                  |
| Liquor_Stores_Current_Exp | Liquor_Stores_Tot_Exp, -Liquor_Stores_Cap_Out                                                                             |
| Liquor_Stores_Constr      | F90                                                                                                                       |
| Total_Util_Total_Exp      | E91, I91, F91, G91, L91, M91, E92, I92, F92, G92, L92, M92,<br>E93, I93, F93, G93, L93, M93, E94, I94, F94, G94, L94, M94 |
| Total_Util_Inter_Exp      | I91, I92, I93, I94                                                                                                        |
| Total_Util_Cap_Outlay     | F91, F92, F93, F94, G91, G92, G93, G94                                                                                    |
| Total_Util_Current_Exp    | Total_Util_Total_Exp, -Total_Util_Inter_Exp, -<br>Total_Util_Cap_Outlay                                                   |
| Total_Util_Construct      | F91, F92, F93, F94                                                                                                        |
| Water_Util_Total_Exp      | E91, I91, F91, G91, L91, M91                                                                                              |
| Water_Util_Inter_Exp      | I91                                                                                                                       |
| Water_Util_Cap_Outlay     | F91, G91                                                                                                                  |
| Water_Util_Current_Exp    | Water_Util_Total_Exp, -Water_Util_Inter_Exp, -<br>Water_Util_Cap_Outlay                                                   |
| Water_Util_Construct      | F91                                                                                                                       |
| Elec_Util_Total_Exp       | E92, I92, F92, G92, L92, M92                                                                                              |
| Elec_Util_Inter_Exp       | I92                                                                                                                       |
| Elec_Util_Cap_Outlay      | F92, G92                                                                                                                  |
| Elec_Util_Current_Exp     | Elec_Util_Total_Exp, -Elec_Util_Inter_Exp, -<br>Elec_Util_Cap_Outlay                                                      |
| Elec_Util_Construct       | F92                                                                                                                       |
| Gas_Util_Total_Exp        | E93, I93, F93, G93, L93, M93                                                                                              |
| Gas_Util_Inter_Exp        | I93                                                                                                                       |
| Gas_Util_Cap_Outlay       | F93, G93                                                                                                                  |
| Gas_Util_Current_Exp      | Gas_Util_Total_Exp, -Gas_Util_Inter_Exp, -<br>Gas_Util_Cap_Outlay                                                         |
| Gas_Util_Construct        | F93                                                                                                                       |
| Trans_Util_Total_Exp      | E94, I94, F94, G94, L94, M94                                                                                              |
| Trans_Util_Inter_Exp      | I94                                                                                                                       |
| Trans_Util_Cap_Outlay     | F94, G94                                                                                                                  |
| Trans_Util_Current_Exp    | Trans_Util_Total_Exp, -Trans_Util_Inter_Exp, -<br>Trans_Util_Cap_Outlay                                                   |
| Trans_Util_Construct      | F94                                                                                                                       |

|                          |                                                      |
|--------------------------|------------------------------------------------------|
| Emp_Ret_Total_Expend     | X11, X12                                             |
| Emp_Ret_Benefit_Paymts   | X11                                                  |
| Emp_Ret_Withdrawals      | X12                                                  |
| Emp_Ret_Other_Paymts     | .                                                    |
| Unemp_Comp_Total_Exp     | Y05, Y06                                             |
| Unemp_Comp_Ben_Paymts    | Y05                                                  |
| Unemp_Ext___Spec_Pmts    | Y06                                                  |
| Total_Debt_Outstanding   | _44T, _49U, _64V                                     |
| Total_Long_Term_Debt_Out | _44T, _49U                                           |
| ST_Debt_End_of_Year      | _64V                                                 |
| Total_Beg_LTD_Out        | _19T, _19U                                           |
| Beg_LTD_Out_Private_Purp | _19T                                                 |
| Beg_LTD_Out_All_Other    | _19U                                                 |
| Beg_LTD_Out_Utility      | . *All detailed debt codes were discontinued in 2005 |
| Beg_LTD_Out_Water_Util   | .                                                    |
| Beg_LTD_Out_Elec_Util    | .                                                    |
| Beg_LTD_Out_Gas_Util     | .                                                    |
| Beg_LTD_Out_Trans_Util   | .                                                    |
| Beg_LTD_Out_General      | .                                                    |
| Beg_LTD_Out_Education    | .                                                    |
| Beg_LTD_Out_Priv_Purp    | .                                                    |
| Beg_LTD_Out_Other_NEC    | .                                                    |
| Total_LTD_Issued         | _24T, _29U                                           |
| LTD_Iss_Private_Purp     | _24T                                                 |
| LTD_Iss_All_Other        | _29U                                                 |
| LTD_Iss_Utility          | .                                                    |
| LTD_Iss_Util_Water       | .                                                    |
| LTD_Iss_Util_Electric    | .                                                    |
| LTD_Iss_Util_Gas_Supply  | .                                                    |
| LTD_Iss_Util_Transit     | .                                                    |
| LTD_Iss_General          | .                                                    |
| LTD_Iss_Gen_Elem_Educ    | .                                                    |
| LTD_Iss_Gen_Other_Educ   | .                                                    |
| LTD_Iss_Gen_Other_NEC    | .                                                    |
| Total_LTD_Iss_FFC        | .                                                    |
| LTD_Iss_FFC_Utility      | .                                                    |
| LTD_Iss_FFC_Water_Util   | .                                                    |
| LTD_Iss_FFC_Elec_Util    | .                                                    |
| LTD_Iss_FFC_Gas_Util     | .                                                    |
| LTD_Iss_FFC_Trans_Util   | .                                                    |
| LTD_Iss_FFC_General      | .                                                    |
| LTD_Iss_FFC_Elem_Educ    | .                                                    |
| LTD_Iss_FFC_Other_Educ   | .                                                    |
| LTD_Iss_FFC_Other_NEC    | .                                                    |
| Total_LTD_Iss_NG         | .                                                    |
| LTD_Iss_NG_Utility       | .                                                    |
| LTD_Iss_NG_Water_Util    | .                                                    |
| LTD_Iss_NG_Elec_Util     | .                                                    |
| LTD_Iss_NG_Gas_Util      | .                                                    |
| LTD_Iss_NG_Trans_Util    | .                                                    |
| LTD_Iss_NG_General       | .                                                    |

|                         |            |
|-------------------------|------------|
| LTD_Iss_NG_Elem_Educ    | .          |
| LTD_Iss_NG_Other_Educ   | .          |
| LTD_Iss_NG_Private_Purp | .          |
| LTD_Iss_NG_Other_NEC    | .          |
| Total_LTD_Iss_Unsp      | .          |
| LTD_Iss_Unsp_Utility    | .          |
| LTD_Iss_Unsp_Water_Util | .          |
| LTD_Iss_Unsp_Elec_Util  | .          |
| LTD_Iss_Unsp_Gas_Util   | .          |
| LTD_Iss_Unsp_Trans_Util | .          |
| LTD_Iss_Unsp_General    | .          |
| LTD_Iss_Unsp_Elem_Educ  | .          |
| LTD_Iss_Unsp_Other_Educ | .          |
| LTD_Iss_Unsp_Other_NEC  | .          |
| Total_LTD_Retired       | _34T, _39U |
| LTD_Ret_Private_Purp    | _34T       |
| LTD_Ret_All_Other       | _39U       |
| LTD_Ret_Utility         | .          |
| LTD_Ret_Util_Water      | .          |
| LTD_Ret_Util_Electric   | .          |
| LTD_Ret_Util_Gas_Supply | .          |
| LTD_Ret_Util_Transit    | .          |
| LTD_Ret_General         | .          |
| LTD_Ret_Gen_Elem_Educ   | .          |
| LTD_Ret_Gen_Other_Educ  | .          |
| LTD_Ret_Gen_Other_NEC   | .          |
| Total_LTD_Ret_FFC       | .          |
| LTD_Ret_FFC_Utility     | .          |
| LTD_Ret_FFC_Water_Util  | .          |
| LTD_Ret_FFC_Elec_Util   | .          |
| LTD_Ret_FFC_Gas_Util    | .          |
| LTD_Ret_FFC_Trans_Util  | .          |
| LTD_Ret_FFC_General     | .          |
| LTD_Ret_FFC_Elem_Educ   | .          |
| LTD_Ret_FFC_Other_Educ  | .          |
| LTD_Ret_FFC_Other_NEC   | .          |
| Total_LTD_Ret_NG        | .          |
| LTD_Ret_NG_Utility      | .          |
| LTD_Ret_NG_Water_Util   | .          |
| LTD_Ret_NG_Elec_Util    | .          |
| LTD_Ret_NG_Gas_Util     | .          |
| LTD_Ret_NG_Trans_Util   | .          |
| LTD_Ret_NG_General      | .          |
| LTD_Ret_NG_Elem_Educ    | .          |
| LTD_Ret_NG_Other_Educ   | .          |
| LTD_Ret_NG_Private_Purp | .          |
| LTD_Ret_NG_Other_NEC    | .          |
| Total_LTD_Ret_Unsp      | .          |
| LTD_Ret_Unsp_Utility    | .          |
| LTD_Ret_Unsp_Water_Util | .          |
| LTD_Ret_Unsp_Elec_Util  | .          |

|                          |                                                                      |
|--------------------------|----------------------------------------------------------------------|
| LTD_Ret_Unsp_Gas_Util    | .                                                                    |
| LTD_Ret_Unsp_Trans_Util  | .                                                                    |
| LTD_Ret_Unsp_General     | .                                                                    |
| LTD_Ret_Unsp_Elem_Educ   | .                                                                    |
| LTD_Ret_Unsp_Other_Educ  | .                                                                    |
| LTD_Ret_Unsp_Other_NEC   | .                                                                    |
| Total_LTD_Out            | _44T, _49U                                                           |
| LTD_Out_Private_Purp     | _44T                                                                 |
| LTD_Out_All_Other        | _49U                                                                 |
| Total_LTD_Out_Utility    | .                                                                    |
| LTD_Out_Util_Water       | .                                                                    |
| LTD_Out_Util_Electric    | .                                                                    |
| LTD_Out_Util_Gas_Supply  | .                                                                    |
| LTD_Out_Util_Transit     | .                                                                    |
| LTD_Out_General          | .                                                                    |
| LTD_Out_Gen_Elem_Educ    | .                                                                    |
| LTD_Out_Gen_Other_Educ   | .                                                                    |
| LTD_Out_Gen_Other_NEC    | .                                                                    |
| Total_LTD_Out_FFC        | .                                                                    |
| LTD_Out_FFC_Utility      | .                                                                    |
| LTD_Out_FFC_Water_Util   | .                                                                    |
| LTD_Out_FFC_Elec_Util    | .                                                                    |
| LTD_Out_FFC_Gas_Util     | .                                                                    |
| LTD_Out_FFC_Trans_Util   | .                                                                    |
| LTD_Out_FFC_General      | .                                                                    |
| LTD_Out_FFC_Elem_Educ    | .                                                                    |
| LTD_Out_FFC_Other_Educ   | .                                                                    |
| LTD_Out_FFC_Other_NEC    | .                                                                    |
| Tot_LTD_Out_NG           | .                                                                    |
| LTD_Out_NG_Utility       | .                                                                    |
| LTD_Out_NG_Water_Util    | .                                                                    |
| LTD_Out_NG_Elec_Util     | .                                                                    |
| LTD_Out_NG_Gas_Util      | .                                                                    |
| LTD_Out_NG_Trans_Util    | .                                                                    |
| LTD_Out_NG_General       | .                                                                    |
| LTD_Out_NG_Elem_Educ     | .                                                                    |
| LTD_Out_NG_Other_Educ    | .                                                                    |
| LTD_Out_NG_Private_Purp  | .                                                                    |
| LTD_Out_NG_Other_NEC     | .                                                                    |
| Total_Cash___Securities  | W01, W31, W61, X21, X30, Z77, Z78, X42, X44, X47, Y07, Y08, Y21, Y61 |
| Insur_Trust_Cash___Sec   | X21, X30, Z77, Z78, X42, X44, X47, Y07, Y08, Y21, Y61                |
| Emp_Retire_Cash___Sec    | X21, X30, X35, Z77, Z78, X42, X47, X44                               |
| Emp_Retire_Cash___Dep    | X21                                                                  |
| Emp_Retire_Total_Sec     | X30, X35, Z77, Z78, X42, X47, X44                                    |
| Emp_Retire_Sec_Tot_Fed   | X30                                                                  |
| Emp_Retire_Sec_S_L_Secur | X35                                                                  |
| Emp_Retire_Sec_Tot_Nong  | Z77, Z78, X42, X47, X44                                              |
| Emp_Retire_Sec_Corp_Bds  | Z77                                                                  |
| Emp_Retire_Sec_Corp_Stk  | Z78                                                                  |
| Emp_Retire_Sec_Mortgages | X42                                                                  |

|                          |               |
|--------------------------|---------------|
| Emp_Retire_Sec_Misc_Inv  | X47           |
| Emp_Retire_Sec_Oth_Nong  | X44           |
| Unemp_Comp_Cash___Sec    | Y07, Y08      |
| Unemp_Comp_Bal_In_US_Tr  | Y07           |
| Unemp_Comp_Other_Balance | Y08           |
| Nonin_Trust_Cash___Sec   | W01, W31, W61 |
| Sinking_Fd_Cash___Sec    | W01           |
| Bond_Fd_Cash___Sec       | W31           |
| Oth_Nonin_Fd_Cash___Sec  | W61           |

---

## Appendix C: Sas Code for Data Consolidation

The following is the complete SAS code we used to consolidate all of the files we received from the census. Please refer to appendix A for step by step instructions for using this SAS code.

```
* This sas macro merges the historical data files that the census provides;
%macro census;
* Defines the text that is repeated in each census file. Base text should be
changed to your correct file path (it is declared twice in the code, so
change both);
%LET BaseText = E:/CensusData/IndFin/IndFin0;
%LET EndTextA = a.Txt;
%LET EndTextB = b.Txt;
%LET EndTextC = c.Txt;
%do i = 7 %to 0 %by -1;
    * Import the data from each of the three physical files in the current
year;
    %let FileName = &BaseText&i&EndTextA; *Creates concatenated file names
following the census naming conventions;
    proc import datafile="&FileName" out=DataA dbms=dml replace;
        delimiter=",";
        getnames=yes;
        GUESSINGROWS=700; *This takes longer to run than is optimal, but
will help to ensure that the data types created by proc import are correct.;
    run;
    %let FileName = &BaseText&i&EndTextB;
    proc import datafile="&FileName" out=DataB dbms=dml replace;
        delimiter=",";
        getnames=yes;
    run;
    %let FileName = &BaseText&i&EndTextC;
    proc import datafile="&FileName" out=DataC dbms=dml replace;
        delimiter=",";
        getnames=yes;
    run;
    * Merge the three data items into one;
    Data LatestData;
        Merge DataA DataB DataC;
        by ID;
    run;
    * The if then else structure allows the larger data set to be created
for the first set of files;
    %if &i = 7 %then
        %do;
            * Add trailing zeros to the ID number to match the format in more
recent data;
            Data LargeData;
            set LatestData;
            run;
            %end;
        %else
            %do;
                * Append the most recently merged data to the larger data file;
                PROC APPEND BASE= LargeData DATA= LatestData force;
                RUN;
            %end;
        %end;
    %end;
```

```

%end;
%LET BaseText = E:/CensusData/IndFin/IndFin; * Make sure to change this
destination to match your file system;
%do i = 70 %to 99;
* Import the data from each of the three physical files in the current year;
  %Let FileName = &BaseText&i&EndTextA; *Creates concatenated file names
following the census naming conventions;
  proc import datafile="&FileName" out=DataA dbms=dlm replace;
    delimiter=",";
    getnames=yes;
    GUESSINGROWS=700;

  run;
  %Let FileName = &BaseText&i&EndTextB;
  proc import datafile="&FileName" out=DataB dbms=dlm replace;
    delimiter=",";
    getnames=yes;
  run;
  %Let FileName = &BaseText&i&EndTextC;
  proc import datafile="&FileName" out=DataC dbms=dlm replace;
    delimiter=",";
    getnames=yes;
  run;
  * Merge the three data items into one;
  Data LatestData;
    Merge DataA DataB DataC;
    by ID;
  run;
  * Append the most recently merged data to the larger data file;
  PROC APPEND BASE= LargeData DATA= LatestData force;
  RUN;
%end;
%do i = 67 %to 67;
* Import the data from each of the three physical files in the current year;
  %Let FileName = &BaseText&i&EndTextA; *Creates concatenated file names
following the census naming conventions;
  proc import datafile="&FileName" out=DataA dbms=dlm replace;
    delimiter=",";
    getnames=yes;
    GUESSINGROWS=700;

  run;
  %Let FileName = &BaseText&i&EndTextB;
  proc import datafile="&FileName" out=DataB dbms=dlm replace;
    delimiter=",";
    getnames=yes;
  run;
  %Let FileName = &BaseText&i&EndTextC;
  proc import datafile="&FileName" out=DataC dbms=dlm replace;
    delimiter=",";
    getnames=yes;
  run;
  * Merge the three data items into one;
  Data LatestData;
    Merge DataA DataB DataC;
    by ID;
  run;
  * Append the most recently merged data to the larger data file;
  PROC APPEND BASE= LargeData DATA= LatestData force;

```

```

        RUN;
    %end;

%MEND Census;

* This line runs the macro shown above;
%Census;

*Create variables not existing in earlier data that can be calculated from
it;
Data LargeData;
    Set LargeData;
    *Manipulate certain identification variables that can be improved in
the overall database;
    FunctionCode = .;
    Enrollment = .;
    if Type_Code = '4' then
        do;
            FunctionCode = Population;
            Population = .;
            Enrollment = .;
        end;
    if Type_Code = '5' then
        do;
            FunctionCode = .;
            Enrollment = Population;
            Population = .;
        end;
    run;

* We now need to format the newer census data to roughly match the format of
the earlier data. This process is;
* accomplished without a macro because there are only a few years of newer
data, and the file names tend to be non-standard;
* Make sure that you change the "Inflie" line on each of the data steps to
the path for the files on your system.

* Read the financial data file in fixed width format, dollar signs indicate
values which are stored as characters;
DATA FinancialData;
    INFILE 'E:/CensusData/2011/2011FinEstDAT_ALL5modp_pu.txt'
    MISOVER;
    INPUT id_state $ 1-2 id_type $ 3 id_county $ 4-6 id_unit $ 7-9 id_add $
10-14 itemcode $ 15-17 data 18-29 year 30-33 code $ 34;
    id = cats(of id_state id_type id_county id_unit);
RUN;

* Transpose the financial information file so that every government ID number
corresponds to one row and every data item has its own column;
PROC TRANSPOSE data=work.FinancialData
                out=work.TransposedData
                name=Year;
    var data;
    by id;
    id itemcode;
run;

```

```

* Change the "year" variable in the financial data matrix to be the year we
are currently working with;
Data TransposedDates;
    Set work.TransposedData;
    Year = 2011;
run;

* Sort each of the matrices by ID code in preparation for merging them.;
proc sort data=TransposedDates;
    by id;
run;

* Read the government information file as a fixed width text file. Dollar
signs indicate fields that are coded as text.;
DATA Identification;
    INFILE 'E:/CensusData/2011/fin_gid_2011.txt'
    MISSOVER;
    INPUT id_state $ 1-2 id_type $ 3 id_county $ 4-6 id_unit $ 7-9 id_add $
10-14 Name $ 15-78 CountyName $ 79-113 FIPSstate $ 114-115 FIPScounty $ 116-
118 FIPSplace $ 119-123 Population 124-132 PopYear $ 133-134 Enrollment 135-
141 EnrollYear $ 142-143 FunctionCode 144-145 SchoolLevel $ 146-147 FYEnd $
148-151 SurveyYear $ 152-153;
    id = cats(of id_state id_type id_county id_unit);
RUN;

* Merge the government identification file with the transposed, dated,
financial information file;
Data LatestData;
    Merge Identification TransposedDates;
    By id;
run;

*Concatenate the Latest data to the larger data file preserving every data
element for later reorganization;
Data NewData;
    Set LatestData;
Run;

*Begin the same process for the 2010 data;
*
*
*
*;

* Read the financial data file in fixed width format, dollar signs indicate
values which are stored as characters;
DATA FinancialData;
    INFILE 'E:/CensusData/2010/2010FinEstDAT_ALL12modp_pu.txt'
    MISSOVER;
    INPUT id_state $ 1-2 id_type $ 3 id_county $ 4-6 id_unit $ 7-9 id_add $
10-14 itemcode $ 15-17 data 18-29 year 30-33 code $ 34;
    id = cats(of id_state id_type id_county id_unit);
RUN;

* Transpose the financial information file so that every government ID number
corresponds to one row and every data item has its own column;

```

```

PROC TRANSPOSE data=work.FinancialData
                out=work.TransposedData
                name=Year;
                var data;
                by id;
                id itemcode;
run;

* Change the "year" variable in the finacnial data matrix to be the year we
are currently working with;
Data TransposedDates;
    Set work.TransposedData;
    Year = 2010;
run;

* Sort each of the matrices by ID code in preparation for merging them.;
proc sort data=TransposedDates;
    by id;
run;

* Read the government information file as a fixed width text file.  Dollar
signs indicate fields that are coded as text.;
DATA Identification;
    INFILE 'E:/CensusData/2010/fin_gid_2010.txt'
    MISSOVER;
    INPUT id_state $ 1-2 id_type $ 3 id_county $ 4-6 id_unit $ 7-9 id_add $
10-14 Name $ 15-78 CountyName $ 79-113 FIPSstate $ 114-115 FIPScounty $ 116-
118 FIPSplace $ 119-123 Population 124-132 PopYear $ 133-134 Enrollment 135-
141 EnrollYear $ 142-143 FunctionCode 144-145 SchoolLevel $ 146-147 FYEnd $
148-151 SurveyYear $ 152-153;
    id = cats(of id_state id_type id_county id_unit);
RUN;

* Merge the government identification file with the transposed, dated,
financial information file;
Data LatestData;
    Merge Identification TransposedDates;
    By id;
run;

*Concatenate the Latest data to the larger data file preserving every data
element for later reorganization;
Data NewData;
    Set NewData LatestData;
Run;

*Begin the same process for the 2009 data;
*
*
*
*;

* Read the financial data file in fixed width format, dollar signs indicate
values which are stored as characters;
DATA FinancialData;
    INFILE 'E:/CensusData/2009/2009FinEstDAT_ALL16modp_pu.txt'

```

```

        MISSOVER;
        INPUT id_state $ 1-2 id_type $ 3 id_county $ 4-6 id_unit $ 7-9 id_add $
10-14 itemcode $ 15-17 data 18-29 year 30-33 code $ 34;
        id = cats(of id_state id_type id_county id_unit);
RUN;

* Transpose the financial information file so that every government ID number
corresponds to one row and every data item has its own column;
PROC TRANSPOSE data=work.FinancialData
                out=work.TransposedData
                name=Year;
                var data;
                by id;
                id itemcode;
run;

* Change the "year" variable in the financial data matrix to be the year we
are currently working with;
Data TransposedDates;
    Set work.TransposedData;
    Year = 2009;
run;

* Sort each of the matrices by ID code in preparation for merging them.;
proc sort data=TransposedDates;
    by id;
run;

* Read the government information file as a fixed width text file. Dollar
signs indicate fields that are coded as text.;
DATA Identification;
    INFILE 'E:/CensusData/2009/fin_gid_2009.txt'
    MISSOVER;
    INPUT id_state $ 1-2 id_type $ 3 id_county $ 4-6 id_unit $ 7-9 id_add $
10-14 Name $ 15-78 CountyName $ 79-113 FIPSstate $ 114-115 FIPScounty $ 116-
118 FIPSplace $ 119-123 Population 124-132 PopYear $ 133-134 Enrollment 135-
141 EnrollYear $ 142-143 FunctionCode 144-145 SchoolLevel $ 146-147 FYEnd $
148-151 SurveyYear $ 152-153;
    id = cats(of id_state id_type id_county id_unit);
RUN;

* Merge the government identification file with the transposed, dated,
financial information file;
Data LatestData;
    Merge Identification TransposedDates;
    By id;
run;

*Concatenate the Latest data to the larger data file preserving every data
element for later reorganization;
Data NewData;
    Set NewData LatestData;
Run;

*Begin the same process for the 2008 data;
*
*
```

```

*
*
* Read the financial data file in fixed width format, dollar signs indicate
values which are stored as characters;
DATA FinancialData;
    INFILE 'E:/CensusData/2008/2008FinInddiv15_modp3.txt'
    MISSOVER;
    INPUT id_state $ 1-2 id_type $ 3 id_county $ 4-6 id_unit $ 7-9 id_add $
10-14 itemcode $ 15-17 data 18-29 year 30-33 code $ 34;
    id = cats(of id_state id_type id_county id_unit);
RUN;

* Transpose the financial information file so that every government ID number
corresponds to one row and every data item has its own column;
PROC TRANSPOSE data=work.FinancialData LET
                out=work.TransposedData
                name=Year;
    var data;
    by id;
    id itemcode;
run;

* Change the "year" variable in the financial data matrix to be the year we
are currently working with;
Data TransposedDates;
    Set work.TransposedData;
    Year = 2008;
run;

* Sort each of the matrices by ID code in preparation for merging them.;
proc sort data=TransposedDates;
    by id;
run;

* Read the government information file as a fixed width text file. Dollar
signs indicate fields that are coded as text.;
DATA Identification;
    INFILE 'E:/CensusData/2008/fin_gid_2008.txt'
    MISSOVER;
    INPUT id_state $ 1-2 id_type $ 3 id_county $ 4-6 id_unit $ 7-9 id_add $
10-14 Name $ 15-78 CountyName $ 79-113 FIPSstate $ 114-115 FIPScounty $ 116-
118 FIPSplace $ 119-123 Population 124-132 PopYear $ 133-134 Enrollment 135-
141 EnrollYear $ 142-143 FunctionCode 144-145 SchoolLevel $ 146-147 FYEnd $
148-151 SurveyYear $ 152-153;
    id = cats(of id_state id_type id_county id_unit);
RUN;

* Merge the government identification file with the transposed, dated,
financial information file;
Data LatestData;
    Merge Identification TransposedDates;
    By id;
run;

```

\*Concatenate the Latest data to the larger data file preserving every data element for later reorganization;

**Data** NewData;

**Set** NewData LatestData;

**Run;**

\*  
\*  
\*  
\*

\*Manually convert the newer data to the format of the older data and keep only variables that exist in the final data set;

**Data** ConvertedNewData (**keep**= SurveyYr Year4 ID State\_Code Type\_Code County  
Name FIPS\_Code\_State FYEndDate YearPop SchLevCode Population Total\_Revenue  
Total\_Rev\_Own\_Sources General\_Revenue Gen\_Rev\_Own\_Sources Total\_Taxes  
Property\_Tax Tot\_Sales\_\_\_Gr\_Rec\_Tax Total\_Gen\_Sales\_Tax  
Total\_Select\_Sales\_Tax Alcoholic\_Beverage\_Tax Amusement\_Tax  
Insurance\_Premium\_Tax Motor\_Fuels\_Tax Pari\_mutuels\_Tax Public\_Utility\_Tax  
Tobacco\_Tax Other\_Select\_Sales\_Tax Total\_License\_Taxes Alcoholic\_Beverage\_Lic  
Amusement\_License Corporation\_License Hunting\_\_\_Fishing\_License  
Motor\_Vehicle\_License Motor\_Veh\_Oper\_License Public\_Utility\_License  
Occup\_and\_Bus\_Lic\_NEC Other\_License\_Taxes Total\_Income\_Taxes  
Individual\_Income\_Tax Corp\_Net\_Income\_Tax Death\_and\_Gift\_Tax  
Docum\_and\_Stock\_Tr\_Tax Severance\_Tax Taxes\_NEC Total\_IG\_Revenue  
Total\_Fed\_IG\_Revenue Fed\_IGR\_Air\_Transport Fed\_IGR\_Education  
Fed\_IGR\_Emp\_Sec\_Adm Fed\_IGR\_Gen\_Rev\_Shar Fed\_IGR\_Gen\_Support  
Fed\_IGR\_Health\_\_\_Hos Fed\_IGR\_Highways  
Fed\_IGR\_Transit\_Sub Fed\_IGR\_Hous\_Com\_Dev Fed\_IGR\_Natural\_Res  
Fed\_IGR\_Public\_Welf Fed\_IGR\_Sewerage Fed\_IGR\_Other Total\_State\_IG\_Revenue  
State\_IGR\_Education State\_IGR\_Tax\_Relief State\_IGR\_Oth\_Gen\_Sup  
State\_IGR\_Health\_\_\_Hos State\_IGR\_Highways State\_IGR\_Transit\_Sub  
State\_IGR\_Hous\_Com\_Dev State\_IGR\_Public\_Welf State\_IGR\_Sewerage  
State\_IGR\_Other Tot\_Local\_IG\_Rev Local\_IGR\_InterSchool\_Aid  
Local\_IGR\_Other\_Education Local\_IGR\_Oth\_Gen\_Sup Local\_IGR\_Health\_\_\_Hos  
Local\_IGR\_Highways  
Local\_IGR\_Transit\_Sub Local\_IGR\_Hous\_Com\_Dev Local\_IGR\_Public\_Welf  
Local\_IGR\_Sewerage Local\_IGR\_Other Tot\_Chgs\_and\_Misc\_Rev  
Total\_General\_Charges Chg\_Air\_Transportation Chg\_Misc\_Com\_Activ  
Chg\_Total\_Education Chg\_Elem\_Ed\_Sch\_Lunch Chg\_Elem\_Ed\_Tuition  
Chg\_Elem\_Ed\_NEC Chg\_Total\_High\_Ed Chg\_Hospitals  
Chg\_Regular\_Highways Chg\_Toll\_Highways Chg\_Housing\_\_\_Comm\_Dev  
Chg\_Total\_Nat\_Res Chg\_Parking Chg\_Parks\_\_\_Recreation Chg\_Sewerage  
Chg\_Solid\_Waste\_Mgmt  
Chg\_Water\_Transport Chg\_All\_Other\_NEC Misc\_General\_Revenue  
Special\_Assessments Prop\_Sale\_Hous\_Com\_Dev Prop\_Sale\_Other  
Interest\_Revenue Fines\_and\_Forfeits Rents\_and\_Royalties  
Net\_Lottery\_Revenue Misc\_General\_Rev\_NEC Liquor\_Stores\_Revenue  
Total\_Utility\_Revenue Water\_Utility\_Revenue Electric\_Utility\_Rev  
Gas\_Utility\_Rev Transit\_Utility\_Rev Total\_Insur\_Trust\_Rev  
Total\_Insur\_Trust\_Ctrb Tot\_Ins\_Trust\_Inv\_Rev Total\_Emp\_Ret\_Rev  
Emp\_Ret\_Total\_Ctrib Emp\_Ret\_Loc\_Emp\_Ctrib Emp\_Ret\_Loc\_To\_Loc\_Sys  
Emp\_Ret\_From\_Other\_Gov Emp\_Ret\_Sta\_To\_Sta\_Ctr Emp\_Ret\_Int\_Rev  
Emp\_Ret\_Other\_Earnings Total\_Unemp\_Rev Unemp\_Payroll\_Tax  
Unemp\_Int\_Revenue Unemp\_Federal\_Advances Total\_Expenditure  
Total\_IG\_Expenditure Direct\_Expenditure Total\_Current\_Expnd  
Total\_Current\_Oper Total\_Capital\_Outlays Total\_Construction

|                         |                            |                             |                         |
|-------------------------|----------------------------|-----------------------------|-------------------------|
|                         | Tot_Assist___Subsidies     | Total_Interest_on_Debt      | Total_Insur_Trust_Ben   |
|                         | Total_Salaries___Wages     |                             |                         |
| General_Expenditure     | IG_Exp_To_State_Govt       | IG_Exp_To_Local_Govts       |                         |
|                         | IG_Exp_To_Federal_Govt     | Direct_General_Expnd        | General_Current_Expnd   |
|                         | General_Current_Oper       | General_Capital_Outlay      | General_Construction    |
|                         | General_Assist___Sub       | General_Debt_Interest       | Air_Trans_Total_Expnd   |
|                         | Air_Trans_Direct_Expnd     | Air_Trans_Cap_Outlay        | Air_Trans_Construction  |
|                         | Air_Trans_IG_To_State      | Air_Trans_IG_Local_Govts    |                         |
|                         | Misc_Com_Activ_Tot_Exp     | Misc_Com_Activ_Cap_Out      | Misc_Com_Activ_Constr   |
| Correct_Total_Exp       | Correct_Direct_Exp         | Correct_Cap_Outlay          |                         |
|                         | Correct_Construct          | Correct_IG_To_St            | Correct_IG_Loc_Govts    |
|                         | Total_Educ_Total_Exp       | Total_Educ_Direct_Exp       | Total_Educ_Assist___Sub |
|                         | Total_Educ_Cap_Outlay      | Total_Educ_Construct        | Elem_Educ_Total_Exp     |
|                         | Elem_Educ_Direct_Exp       | Elem_Educ_Cap_Outlay        | Elem_Educ_Construction  |
|                         | Elem_Educ_IG_To_State      | Elem_Educ_IG_Local_Govts    |                         |
|                         | Elem_Educ_IG_Sch_to_Sch    | Higher_Ed_Total_Exp         | Higher_Ed_Direct_Exp    |
|                         | Higher_Ed_Cap_Outlay       |                             |                         |
| Higher_Ed_Construct     | Higher_Ed_IG_To_St         | Higher_Ed_IG_Loc_Govts      |                         |
|                         | Educ_NEC_Total_Expnd       | Educ_NEC_Direct_Expnd       | Educ_NEC_Assistance     |
|                         | Educ_NEC_Cap_Outlay        | Educ_NEC_Construction       | Educ_NEC_IG_To_State    |
|                         | Educ_NEC_IG_Local_Govts    | Emp_Sec_Adm_Direct_Exp      | Emp_Sec_Adm_Cap_Outlay  |
|                         | Emp_Sec_Adm_Construct      | Fin_Admin_Total_Exp         | Fin_Admin_Direct_Exp    |
|                         | Fin_Admin_Cap_Outlay       | Fin_Admin_Construction      | Fin_Admin_IG_To_State   |
|                         | Fin_Admin_IG_Local_Govts   | Fire_Prot_Total_Expnd       |                         |
|                         | Fire_Prot_Direct_Exp       |                             |                         |
| Fire_Prot_Cap_Outlay    | Fire_Prot_Construction     | Fire_Prot_IG_To_State       |                         |
|                         | Fire_Prot_IG_Local_Govts   | Judicial_Total_Expnd        |                         |
|                         | Judicial_Direct_Expnd      | Judicial_Cap_Outlay         | Judicial_Construction   |
|                         | Judicial_IG_To_State       | Judicial_IG_Local_Govts     | Cen_Staff_Total_Expnd   |
|                         | Cen_Staff_Direct_Exp       | Cen_Staff_Cap_Outlay        | Cen_Staff_Construction  |
|                         | Cen_Staff_IG_To_State      | Cen_Staff_IG_Local_Govts    |                         |
|                         | Gen_Pub_Bldg_Total_Exp     | Gen_Pub_Bldg_Cap_Out        | Gen_Pub_Bldg_Construct  |
| Health_Total_Expnd      | Health_Direct_Expnd        | Health_Capital_Outlay       |                         |
|                         | Health_Construction        | Health_IG_To_State          | Health_IG_Local_Govts   |
|                         | Total_Hospital_Total_Exp   | Total_Hospital_Dir_Exp      |                         |
|                         | Total_Hospital_Cap_Out     | Total_Hospital_Construct    |                         |
|                         | Total_Hospital_IG_To_State | Total_Hospital_IG_Loc_Govts |                         |
|                         | Own_Hospital_Total_Exp     | Own_Hospital_Cap_Out        | Own_Hospital_Construct  |
|                         | Hosp_Other_Total_Exp       | Hosp_Other_Direct_Exp       | Hosp_Other_Cap_Outlay   |
|                         | Hosp_Other_Construct       | Hosp_Other_IG_To_State      |                         |
| Hosp_Other_IG_Loc_Govts | Total_Highways_Tot_Exp     | Total_Highways_Dir_Exp      |                         |
|                         | Total_Highways_Cap_Out     | Total_Highways_Construct    |                         |
|                         | Regular_Hwy_Total_Exp      | Regular_Hwy_Direct_Exp      | Regular_Hwy_Cap_Outlay  |
|                         | Regular_Hwy_Construct      | Regular_Hwy_IG_To_Sta       |                         |
|                         | Regular_Hwy_IG_Loc_Govts   | Toll_Hwy_Total_Expnd        |                         |
|                         | Toll_Hwy_Cap_Outlay        | Toll_Hwy_Construction       | Transit_Sub_Total_Exp   |
|                         | Transit_Sub_Direct_Sub     | Transit_Sub_IG_To_Sta       |                         |
|                         | Transit_Sub_IG_Loc_Govts   | Transit_Sub_To_Own_Sys      |                         |
|                         | Hous___Com_Total_Exp       |                             |                         |
| Hous___Com_Direct_Exp   | Hous___Com_Cap_Outlay      | Hous___Com_Construct        |                         |
|                         | Hous___Com_IG_To_State     | Hous___Com_IG_Loc_Govts     | Libraries_Total_Expnd   |
|                         | Libraries_Direct_Exp       | Libraries_Cap_Outlay        | Libraries_Construction  |
|                         | Libraries_IG_To_State      | Libraries_IG_Local_Govts    |                         |
|                         | Natural_Res_Total_Exp      | Natural_Res_Direct_Exp      | Natural_Res_Cap_Outlay  |
|                         | Natural_Res_Construct      | Natural_Res_IG_To_Sta       |                         |
|                         | Natural_Res_IG_Loc_Govts   | Parking_Total_Expnd         |                         |
|                         | Parking_Direct_Expnd       | Parking_Capital_Outlay      |                         |

|                          |                          |                         |
|--------------------------|--------------------------|-------------------------|
| Parking_Construction     | Parking_IG_To_State      | Parking_IG_Local_Govts  |
| Parks__Rec_Total_Exp     | Parks__Rec_Direct_Exp    | Parks__Rec_Cap_Outlay   |
| Parks__Rec_Construct     | Parks__Rec_IG_To_Sta     |                         |
| Parks__Rec_IG_Loc_Govts  | Police_Prot_Total_Exp    |                         |
| Police_Prot_Direct_Exp   | Police_Prot_Cap_Outlay   | Police_Prot_Construct   |
| Police_Prot_IG_To_Sta    | Police_Prot_IG_Loc_Govts |                         |
| Prot_Insp_Total_Exp      | Prot_Insp_Direct_Exp     | Prot_Insp_Cap_Outlay    |
| Prot_Insp_Construction   | Prot_Insp_IG_To_State    |                         |
| Prot_Insp_IG_Local_Govts | Public_Welf_Total_Exp    | Public_Welf_Direct_Exp  |
| Public_Welf_Cash_Asst    | Public_Welf_Cap_Outlay   | Public_Welf_Construct   |
| Welf_Categ_Total_Exp     | Welf_Categ_Cash_Assist   | Welf_Categ_IG_To_State  |
| Welf_Categ_IG_Loc_Govts  | Welf_Cash_Total_Exp      | Welf_Cash_Cash_Assist   |
| Welf_Cash_IG_Local_Govts | Welf_Vend_Pmts_Medical   |                         |
| Welf_Vend_Pmts_NEC       | Welf_State_Share_Part_D  | Welf_Ins_Total_Exp      |
| Welf_Ins_Cap_Outlay      | Welf_Ins_Construction    | Welf_NEC_Total_Exp      |
| Welf_NEC_Direct_Exp      | Welf_NEC_Cap_Outlay      | Welf_NEC_Construction   |
| Welf_NEC_IG_To_State     | Welf_NEC_IG_Local_Govts  | Sewerage_Total_Exp      |
| Sewerage_Direct_Exp      | Sewerage_Cap_Outlay      | Sewerage_Construction   |
| Sewerage_IG_To_State     | Sewerage_IG_Local_Govts  | SW_Mgmt_Total_Exp       |
| SW_Mgmt_Direct_Exp       | SW_Mgmt_Capital_Outlay   | SW_Mgmt_Construction    |
| SW_Mgmt_IG_To_State      | SW_Mgmt_IG_Local_Govts   | Water_Trans_Total_Exp   |
| Water_Trans_Direct_Exp   | Water_Trans_Cap_Outlay   | Water_Trans_Construct   |
| Water_Trans_IG_To_Sta    | Water_Trans_IG_Loc_Govts | Interest_on_Gen_Debt    |
| General_NEC_Total_Exp    | General_NEC_Direct_Exp   | VetBonus                |
| General_NEC_Cap_Outlay   | General_NEC_Construct    | General_NEC_IG_To_St    |
| General_NEC_IG_Loc_Govts | General_NEC_IG_To_Fed    |                         |
| Liquor_Stores_Tot_Exp    | Liquor_Stores_Cap_Out    | Liquor_Stores_Constr    |
| Total_Util_Total_Exp     | Total_Util_Inter_Exp     | Total_Util_Cap_Outlay   |
| Total_Util_Construct     | Water_Util_Total_Exp     | Water_Util_Inter_Exp    |
| Water_Util_Cap_Outlay    | Water_Util_Construct     | Elec_Util_Total_Exp     |
| Elec_Util_Inter_Exp      | Elec_Util_Cap_Outlay     | Elec_Util_Construct     |
| Gas_Util_Total_Exp       | Gas_Util_Inter_Exp       | Gas_Util_Cap_Outlay     |
| Gas_Util_Construct       | Trans_Util_Total_Exp     | Trans_Util_Inter_Exp    |
| Trans_Util_Cap_Outlay    | Trans_Util_Construct     | Emp_Ret_Total_Exp       |
| Emp_Ret_Benefit_Paymts   | Emp_Ret_Withdrawals      | Emp_Ret_Other_Paymts    |
| Unemp_Comp_Total_Exp     | Unemp_Comp_Ben_Paymts    | Unemp_Ext__Spec_Pmts    |
| Total_Debt_Outstanding   | Total_Long_Term_Debt_Out | ST_Debt_End_of_Year     |
| Total_Beg_LTD_Out        | Beg_LTD_Out_Private_Purp | Beg_LTD_Out_All_Other   |
| Beg_LTD_Out_Utility      | Beg_LTD_Out_Water_Util   | Beg_LTD_Out_Elec_Util   |
| Beg_LTD_Out_Gas_Util     | Beg_LTD_Out_Trans_Util   | Beg_LTD_Out_General     |
| Beg_LTD_Out_Education    | Beg_LTD_Out_Priv_Purp    | Beg_LTD_Out_Other_NEC   |
| Total_LTD_Issued         | LTD_Iss_Private_Purp     | LTD_Iss_All_Other       |
| LTD_Iss_Utility          | LTD_Iss_Util_Water       | LTD_Iss_Util_Electric   |
| LTD_Iss_Util_Gas_Supply  | LTD_Iss_Util_Transit     | LTD_Iss_General         |
| LTD_Iss_Gen_Elem_Educ    | LTD_Iss_Gen_Other_Educ   | LTD_Iss_Gen_Other_NEC   |
| Total_LTD_Iss_FFC        | LTD_Iss_FFC_Utility      | LTD_Iss_FFC_Water_Util  |
| LTD_Iss_FFC_Elec_Util    | LTD_Iss_FFC_Gas_Util     | LTD_Iss_FFC_Trans_Util  |
| LTD_Iss_FFC_General      | LTD_Iss_FFC_Elem_Educ    | LTD_Iss_FFC_Other_Educ  |
| LTD_Iss_FFC_Other_NEC    | Total_LTD_Iss_NG         | LTD_Iss_NG_Utility      |
| LTD_Iss_NG_Water_Util    | LTD_Iss_NG_Elec_Util     | LTD_Iss_NG_Gas_Util     |
| LTD_Iss_NG_Trans_Util    | LTD_Iss_NG_General       | LTD_Iss_NG_Elem_Educ    |
| LTD_Iss_NG_Other_Educ    | LTD_Iss_NG_Private_Purp  | LTD_Iss_NG_Other_NEC    |
| Total_LTD_Iss_Unsp       | LTD_Iss_Unsp_Utility     | LTD_Iss_Unsp_Water_Util |
| LTD_Iss_Unsp_Elec_Util   | LTD_Iss_Unsp_Gas_Util    | LTD_Iss_Unsp_Trans_Util |
| LTD_Iss_Unsp_General     | LTD_Iss_Unsp_Elem_Educ   | LTD_Iss_Unsp_Other_Educ |
| LTD_Iss_Unsp_Other_NEC   | Total_LTD_Retired        | LTD_Ret_Private_Purp    |
| LTD_Ret_All_Other        | LTD_Ret_Utility          | LTD_Ret_Util_Water      |

```

LTD_Ret_Util_Electric    LTD_Ret_Util_Gas_Supply LTD_Ret_Util_Transit
  LTD_Ret_General    LTD_Ret_Gen_Elem_Educ    LTD_Ret_Gen_Other_Educ
  LTD_Ret_Gen_Other_NEC    Total_LTD_Ret_FFC LTD_Ret_FFC_Utility
  LTD_Ret_FFC_Water_Util    LTD_Ret_FFC_Elec_Util    LTD_Ret_FFC_Gas_Util
  LTD_Ret_FFC_Trans_Util    LTD_Ret_FFC_General    LTD_Ret_FFC_Elem_Educ
  LTD_Ret_FFC_Other_Educ    LTD_Ret_FFC_Other_NEC    Total_LTD_Ret_NG
  LTD_Ret_NG_Utility    LTD_Ret_NG_Water_Util    LTD_Ret_NG_Elec_Util
LTD_Ret_NG_Gas_Util    LTD_Ret_NG_Trans_Util    LTD_Ret_NG_General
  LTD_Ret_NG_Elem_Educ    LTD_Ret_NG_Other_Educ    LTD_Ret_NG_Private_Purp
  LTD_Ret_NG_Other_NEC    Total_LTD_Ret_Unsp    LTD_Ret_Unsp_Utility
  LTD_Ret_Unsp_Water_Util    LTD_Ret_Unsp_Elec_Util    LTD_Ret_Unsp_Gas_Util
  LTD_Ret_Unsp_Trans_Util    LTD_Ret_Unsp_General    LTD_Ret_Unsp_Elem_Educ
  LTD_Ret_Unsp_Other_Educ    LTD_Ret_Unsp_Other_NEC    Total_LTD_Out
  LTD_Out_Private_Purp    LTD_Out_All_Other    Total_LTD_Out_Utility
LTD_Out_Util_Water    LTD_Out_Util_Electric    LTD_Out_Util_Gas_Supply
  LTD_Out_Util_Transit    LTD_Out_General    LTD_Out_Gen_Elem_Educ
  LTD_Out_Gen_Other_Educ    LTD_Out_Gen_Other_NEC    Total_LTD_Out_FFC
  LTD_Out_FFC_Utility    LTD_Out_FFC_Water_Util    LTD_Out_FFC_Elec_Util
  LTD_Out_FFC_Gas_Util    LTD_Out_FFC_Trans_Util    LTD_Out_FFC_General
  LTD_Out_FFC_Elem_Educ    LTD_Out_FFC_Other_Educ    LTD_Out_FFC_Other_NEC
  Tot_LTD_Out_NG    LTD_Out_NG_Utility    LTD_Out_NG_Water_Util
LTD_Out_NG_Elec_Util    LTD_Out_NG_Gas_Util    LTD_Out_NG_Trans_Util
  LTD_Out_NG_General    LTD_Out_NG_Elem_Educ    LTD_Out_NG_Other_Educ
  LTD_Out_NG_Private_Purp    LTD_Out_NG_Other_NEC    Total_Cash__Securities
  Insur_Trust_Cash__Sec    Emp_Retire_Cash__Sec    Emp_Retire_Cash__Dep
  Emp_Retire_Total_Sec    Emp_Retire_Sec_Tot_Fed
  Emp_Retire_Sec_S_L_Secur    Emp_Retire_Sec_Tot_Nong
  Emp_Retire_Sec_Corp_Bds    Emp_Retire_Sec_Corp_Stk
  Emp_Retire_Sec_Mortgages
Emp_Retire_Sec_Misc_Inv    Emp_Retire_Sec_Oth_Nong    Unemp_Comp_Cash__Sec
  Unemp_Comp_Bal_In_US_Tr    Unemp_Comp_Other_Balance
  Nonin_Trust_Cash__Sec    Sinking_Fd_Cash__Sec    Bond_Fd_Cash__Sec
  Oth_Nonin_Fd_Cash__Sec    FunctionCode    Enrollment);
set NewData;
  * Convert variables to ones that exist in the earlier dataset.
Multiplying by 1 converts character variables to numeric formats;
  SurveyYr = SurveyYear*1;
  Year4 = Year*1;
  State_Code = id_state;
  Type_Code = id_type;
  County = id_County;
  FIPS_Code_State = FIPSstate;
  FYEndDate = FYEnd;
  YearPop = PopYear;
  SchLevCode = SchoolLevel;

  *Consolidate and name variables;
  *Revenue;
  Total_Revenue = sum(B01, B21, B22, B30, B42, B46, B50, B59, B79,
B80, B89, B91, B92, B93, B94, C21, C30, C42, C46, C50, C79, C80, C89, C91,
C92, C93, C94, D21, D30, D42, D46, D50, D79, D80, D89, D91, D92, D93, D94,
T01, T09, T10, T11, T12, T13, T14, T15, T16, T19, T20, T21, T22, T23, T24,
T25, T27, T28, T29, T40, T41, T50, T51, T53, T99, A01, A03, A09, A10, A12,
A16, A18, A21, A36, A44, A45, A50, A56, A59, A60, A61, A80, A81, A87, A89,
U01, U11, U20, U21, U30, U40, U41, U50, U95, U99, A90, A91, A92, A93, A94,
X01, X02, X05, X08, Y01, Y02, Y04, Y11, Y12, Y51, Y52);

```

```

        General_Revenue = sum(B01, B21, B22, B30, B42, B46, B50, B59,
B79, B80, B89, B91, B92, B93, B94, C21, C30, C42, C46, C50, C79, C80, C89,
C91, C92, C93, C94, D21, D30, D42, D46, D50, D79, D80, D89, D91, D92, D93,
D94, T01, T09, T10, T11, T12, T13, T14, T15, T16, T19, T20, T21, T22, T23,
T24, T25, T27, T28, T29, T40, T41, T50, T51, T53, T99, A01, A03, A09, A10,
A12, A16, A18, A21, A36, A44, A45, A50, A56, A59, A60, A61, A80, A81, A87,
A89, U01, U11, U20, U21, U30, U40, U41, U50, U95, U99);

        Gen_Rev_Own_Sources = sum(A01, A03, A09, A10, A12, A16, A18, A21,
A36, A44, A45, A50, A56, A59, A60, A61, A80, A81, A87, A89, T01, T09, T10,
T11, T12, T13, T14, T15, T16, T19, T20, T21, T22, T23, T24, T25, T27, T28,
T29, T40, T41, T50, T51, T53, T99, U01, U11, U20, U21, U30, U40, U41, U50,
U95, U99);

        Total_Rev_Own_Sources = sum(T01, T09, T10, T11, T12, T13, T14,
T15, T16, T19, T20, T21, T22, T23, T24, T25, T27, T28, T29, T40, T41, T50,
T51, T53, T99, A01, A03, A09, A10, A12, A16, A18, A21, A36, A44, A45, A50,
A56, A59, A60, A61, A80, A81, A87, A89, U01, U11, U20, U21, U30, U40, U41,
U50, U95, U99, A90, A91, A92, A93, A94, X01, X02, X05, X08, Y01, Y02, Y04,
Y11, Y12, Y51, Y52);

        *Taxes;

        Total_Taxes = sum(T01, T09, T10, T11, T12, T13, T14, T15, T16,
T19, T20, T21, T22, T23, T24, T25, T27, T28, T29, T40, T41, T50, T51, T53,
T99);

        Property_Tax = T01;
        Tot_Sales___Gr_Rec_Tax = sum(T09, T10, T11, T12, T13, T14, T15,
T16, T19);

        Total_Gen_Sales_Tax = T09;
        Total_Select_Sales_Tax = sum(T10, T11, T12, T13, T14, T15, T16,
T19);

        Alcoholic_Beverage_Tax = T10;
        Amusement_Tax = T11;
        Insurance_Premium_Tax = T12;
        Motor_Fuels_Tax = T13;
        Pari_mutuels_Tax = T14;
        Public_Utility_Tax = T15;
        Tobacco_Tax = T16;
        Other_Select_Sales_Tax = T19;

        *Licenses;

        Total_License_Taxes = sum(T20 , T21 , T22 , T23 , T24 , T25 , T27
, T28 , T29);

        Alcoholic_Beverage_Lic = T20;
        Amusement_License = T21;
        Corporation_License = T22;
        Hunting___Fishing_License = T23;
        Motor_Vehicle_License = T24;
        Motor_Veh_Oper_License = T25;
        Public_Utility_License = T27;
        Occup_and_Bus_Lic_NEC = T28;
        Other_License_Taxes = T29;

        *Income Taxes;

        Total_Income_Taxes = sum(T40 , T41 , T50 , T51 , T53 , T99);
        Individual_Income_Tax = T40;
        Corp_Net_Income_Tax = T41;
        Death_and_Gift_Tax = T50;
        Docum_and_Stock_Tr_Tax = T51;

```

```

Severance_Tax = T53;
Taxes_NEC = T99;

* Intergovernmental Revenue;
Total_IG_Revenue = sum(B01, B21, B22, B30, B42, B46, B50, B59,
B79, B80, B89, B91, B92, B93, B94, C21, C30, C42, C46, C50, C79, C80, C89,
C91, C92, C93, C94, D21, D30, D42, D46, D50, D79, D80, D89, D91, D92, D93,
D94);

* Federal;
Total_Fed_IG_Revenue = sum(B01, B21, B22, B30, B42, B46, B50,
B59, B79, B80, B89, B91, B92, B93, B94);
Fed_IGR_Air_Transport = B01;
Fed_IGR_Education = B21;
Fed_IGR_Emp_Sec_Adm = B22;
Fed_IGR_Gen_Rev_Shar = .; *Obsolete after 1987;
Fed_IGR_Gen_Support = B30;
Fed_IGR_Health__Hos = B42;
Fed_IGR_Highways = B46;
Fed_IGR_Transit_Sub = B94;
Fed_IGR_Hous_Com_Dev = B50;
Fed_IGR_Natural_Res = B59;
Fed_IGR_Public_Welf = B79;
Fed_IGR_Sewerage = B80;
Fed_IGR_Other = B89;

* State;
Total_State_IG_Revenue = sum(C21, C30, C42, C46, C50, C79, C80,
C89, C91, C92, C93, C94);
State_IGR_Education = C21;
State_IGR_Tax_Relief = .; *Obsolete after 1987;
State_IGR_Oth_Gen_Sup = C30;
State_IGR_Health__Hos = C42;
State_IGR_Highways = C46;
State_IGR_Transit_Sub = C94;
State_IGR_Hous_Com_Dev = C50;
State_IGR_Public_Welf = C79;
State_IGR_Sewerage = C80;
State_IGR_Other = C89;

* Local;
Tot_Local_IG_Rev = sum(D21, D30, D42, D46, D50, D79, D80, D89,
D91, D92, D93, D94);
Local_IGR_InterSchool_Aid = D11;
Local_IGR_Other_Education = D21;
Local_IGR_Oth_Gen_Sup = D30;
Local_IGR_Health__Hos = D42;
Local_IGR_Highways = D46;
Local_IGR_Transit_Sub = D94;
Local_IGR_Hous_Com_Dev = D50;
Local_IGR_Public_Welf = D79;
Local_IGR_Sewerage = D80;
Local_IGR_Other = D89;

* Charges and Misc Revenue;

```

```

Tot_Chgs_and_Misc_Rev = sum(A01, A03, A09, A10, A12, A16, A18,
A21, A36, A44, A45, A50, A56, A59, A60, A61, A80, A81, A87, A89, U01, U11,
U20, U21, U30, U40, U41, U50, U95, U99);

* Charges;
Total_General_Charges = sum(A01, A03, A09, A10, A12, A16, A18,
A21, A36, A44, A45, A50, A56, A59, A60, A61, A80, A81, A87, A89);
Chg_Air_Transportation = A01;
Chg_Misc_Com_Activ = A03;
Chg_Total_Education = sum(A09, A10, A12, A16, A18, A21);
Chg_Elem_Ed_Sch_Lunch = A09;
Chg_Elem_Ed_Tuition = A10;
Chg_Elem_Ed_NEC = A12;
Chg_Total_High_Ed = sum(A16, A18);
Chg_Hospitals = A36;
Chg_Regular_Highways = A44;
Chg_Toll_Highways = A45;
Chg_Housing__Comm_Dev = A50;
Chg_Total_Nat_Res = sum(A56 , A59);
Chg_Parking = A60;
Chg_Parks__Recreation = A61;
Chg_Sewerage = A80;
Chg_Solid_Waste_Mgmt = A81;
Chg_Water_Transport = A87;
Chg_All_Other_NEC = A89;

* Misc Revenue;
Misc_General_Revenue = sum(U01, U11, U20, U21, U30, U40, U41,
U50, U95, U99);
Special_Assessments = U01;
Prop_Sale_Hous_Com_Dev = .; *Deleted as of 2005 and reported in
U11 Prop_Sale_Other;
Prop_Sale_Other = U11;
Interest_Revenue = U20;
Fines_and_Forfeits = U30;
Rents_and_Royalties = sum(U40 , U41);
Net_Lottery_Revenue = U95;
Misc_General_Rev_NEC = U99;

* Liquor and Utilities;
Liquor_Stores_Revenue = A90;
Total_Utility_Revenue = sum(A91, A92, A93, A94);
Water_Utility_Revenue = A91;
Electric_Utility_Rev = A92;
Gas_Utility_Rev = A93;
Transit_Utility_Rev = A94;

* Insurance Trusts;
Total_Insur_Trust_Rev = sum(X01, X02, X05, X08, Y01, Y02, Y04,
Y11, Y12, Y51, Y52);
Total_Insur_Trust_Ctrib = sum(X01, X02, X05, Y01);
Tot_Ins_Trust_Inv_Rev = sum(X08 , Y02);

*Retirement Plan Data;
Total_Emp_Ret_Rev = sum(X01, X02, X05, X08);
Emp_Ret_Total_Ctrib = sum(X01, X02, X05);
Emp_Ret_Loc_Emp_Ctrib = X01;

```

```

Emp_Ret_Loc_To_Loc_Sys = X04;
Emp_Ret_From_Other_Gov = X05;
Emp_Ret_Sta_To_Sta_Ctr = X06;
Emp_Ret_Int_Rev = X08;
Emp_Ret_Other_Earnings = .; *Consolidated with X08
Emp_Ret_Int_Rev in 1990;

* Old data does not have Worker's Comp information;

* Unemployment Revenue;
Total_Unemp_Rev = sum(Y01, Y02, Y04);
Unemp_Payroll_Tax = Y01;
Unemp_Int_Revenue = Y02;
Unemp_Federal_Advances = Y04;

*Expenses;
Total_Expenditure = sum(E01, E03, E04, E05, E12, E16, E18, E21,
E22, E23, E24, E25, E26, E29, E31, E32, E36, E44, E44, E45, E50, E52, E55,
E56, E59, E60, E61, E62, E66, E74, E75, E77, E79, E80, E81, E85, E87, E89,
E90, E91, E92, E93, E94, I89, I91, I92, I93, I94, J19, J67, J68, J85, X11,
X12, Y05, Y06, Y14, Y53, F01, F03, F04, F05, F12, F16, F18, F21, F22, F23,
F24, F25, F26, F29, F31, F32, F36, F44, F45, F50, F52, F55, F56, F59, F60,
F61, F62, F66, F77, F79, F80, F81, F85, F87, F89, F90, F91, F92, F93, F94,
G01, G03, G04, G05, G12, G16, G18, G21, G22, G23, G24, G25, G26, G29, G31,
G32, G36, G44, G45, G50, G52, G55, G56, G59, G60, G61, G62, G66, G77, G79,
G80, G81, G85, G87, G89, G90, G91, G92, G93, G94, L01, L04, L05, L12, L18,
L23, L25, L29, L32, L36, L44, L52, L59, L60, L61, L62, L66, L67, L79, L80,
L81, L87, L89, L91, L92, L93, L94, M01, M04, M05, M12, M18, M21, M23, M24,
M25, M29, M30, M32, M36, M44, M50, M52, M55, M56, M59, M60, M61, M62, M66,
M67, M68, M79, M80, M81, M87, M89, M91, M92, M93, M94, Q12, Q18, S67, S74,
S89);

*Totals;
Total_IG_Expenditure = sum(L01, L04, L05, L12, L18, L23, L25,
L29, L32, L36, L44, L50, L52, L59, L60, L61, L62, L66, L67, L79, L80, L81,
L87, L89, L91, L92, L93, L94, M01, M04, M05, M12, M18, M21, M23, M24, M25,
M29, M30, M32, M36, M44, M50, M52, M52, M55, M56, M59, M60, M61, M62, M66,
M67, M68, M79, M80, M81, M87, M89, M91, M92, M93, M94, Q12, Q18, S67, S89);
Direct_Expenditure = sum(E01, E03, E04, E05, E12, E16, E18, E21,
E22, E23, E24, E25, E26, E29, E31, E32, E36, E44, E45, E50, E52, E55, E56,
E59, E60, E61, E62, E66, E74, E75, E77, E79, E80, E81, E85, E87, E89, E90,
E91, E92, E93, E94, F01, F03, F04, F05, F12, F16, F18, F21, F22, F23, F24,
F25, F26, F29, F31, F32, F36, F44, F45, F50, F52, F55, F56, F59, F60, F61,
F62, F66, F77, F79, F80, F81, F85, F87, F89, F90, F91, F92, F93, F94, G01,
G03, G04, G05, G12, G16, G18, G21, G22, G23, G24, G25, G26, G29, G31, G32,
G36, G44, G45, G50, G52, G55, G56, G59, G60, G61, G62, G66, G77, G79, G80,
G81, G85, G87, G89, G90, G91, G92, G93, G94, X11, X12, Y05, Y06, Y14, Y53,
J19, J67, J68, J85, I89, I91, I92, I93, I94);
Total_Current_Oper = sum(E01, E03, E04, E05, E12, E16, E18, E21,
E22, E23, E24, E25, E26, E29, E31, E32, E36, E44, E45, E50, E52, E55, E56,
E59, E60, E61, E62, E66, E74, E75, E77, E79, E80, E81, E85, E87, E89, E90,
E91, E92, E93, E94);
Total_Capital_Outlays = sum(F01, F03, F04, F05, F12, F16, F18,
F21, F22, F23, F24, F25, F26, F29, F31, F32, F36, F44, F45, F50, F52, F55,
F56, F59, F60, F61, F62, F66, F77, F79, F80, F81, F85, F87, F89, F90, F91,
F92, F93, F94, G01, G03, G04, G05, G12, G16, G18, G21, G22, G23, G24, G25,

```

```

G26, G29, G31, G32, G36, G44, G45, G50, G52, G55, G56, G59, G60, G61, G62,
G66, G77, G79, G80, G81, G85, G87, G89, G90, G91, G92, G93, G94);
    Total_Construction = sum(F01, F03, F04, F05, F12, F16, F18, F21,
F22, F23, F24, F25, F26, F29, F31, F32, F36, F44, F45, F50, F52, F55, F56,
F59, F60, F61, F62, F66, F77, F79, F80, F81, F85, F87, F89, F90, F91, F92,
F93, F94);
    Tot_Assist__Subsidies = sum(J19, J67, J68, J85);
    Total_Interest_on_Debt = sum(I89, I91, I92, I93, I94);
    Total_Insur_Trust_Ben = sum(X11, X12, Y05, Y06, Y14, Y53);
    Total_Salaries__Wages = Z00;
    Total_Current_Expend = sum(Total_Expenditure, -
Total_Capital_Outlays);

* General Expenses;
    General_Expenditure = sum(E01, E03, E04, E05, E12, E16, E18, E21,
E22, E23, E24, E25, E26, E29, E31, E32, E36, E44, E45, E50, E52, E55, E56,
E59, E60, E61, E62, E66, E74, E75, E77, E79, E80, E81, E85, E87, E89, E90,
E91, E92, E93, E94, F01, F03, F04, F05, F12, F16, F18, F21, F22, F23, F24,
F25, F26, F29, F31, F32, F36, F44, F45, F50, F52, F55, F56, F59, F60, F61,
F62, F66, F77, F79, F80, F81, F85, F87, F89, F90, F91, F92, F93, F94, G01,
G03, G04, G05, G12, G16, G18, G21, G22, G23, G24, G25, G26, G29, G31, G32,
G36, G44, G45, G50, G52, G55, G56, G59, G60, G61, G62, G66, G77, G79, G80,
G81, G85, G87, G89, G90, G91, G92, G93, G94, X11, X12, Y05, Y06, Y14, Y53,
J19, J67, J68, J85, I89, I91, I92, I93, I94);
    IG_Exp_To_State_Govt = sum(L01, L04, L05, L12, L18, L23, L25,
L29, L32, L36, L44, L50, L52, L59, L60, L61, L62, L66, L67, L79, L80, L81,
L87, L89, L91, L92, L93, L94);
    IG_Exp_To_Local_Govts = sum(M01, M04, M05, M12, M18, M21, M23,
M24, M25, M29, M30, M32, M36, M44, M50, M52, M55, M56, M59, M60, M61,
M62, M66, M67, M68, M79, M80, M81, M87, M89, M91, M92, M93, M94);
    IG_Exp_To_Federal_Govt = sum(S67, S74, S89);
    Direct_General_Expend = sum(E01, E03, E04, E05, E12, E16, E18,
E21, E22, E23, E24, E25, E26, E29, E31, E32, E36, E44, E45, E50, E52, E55,
E56, E59, E60, E61, E62, E66, E74, E75, E77, E79, E80, E81, E85, E87, E89,
E90, E91, E92, E93, E94, F01, F03, F04, F05, F12, F16, F18, F21, F22, F23,
F24, F25, F26, F29, F31, F32, F36, F44, F45, F50, F52, F55, F56, F59, F60,
F61, F62, F66, F77, F79, F80, F81, F85, F87, F89, F90, F91, F92, F93, F94,
G01, G03, G04, G05, G12, G16, G18, G21, G22, G23, G24, G25, G26, G29, G31,
G32, G36, G44, G45, G50, G52, G55, G56, G59, G60, G61, G62, G66, G77, G79,
G80, G81, G85, G87, G89, G90, G91, G92, G93, G94, X11, X12, Y05, Y06, Y14,
Y53, J19, J67, J68, J85, I89, I91, I92, I93, I94);
    General_Current_Oper = sum(E01, E03, E04, E05, E12, E16, E18,
E21, E22, E23, E24, E25, E26, E29, E31, E32, E36, E44, E45, E50, E52, E55,
E56, E59, E60, E61, E62, E66, E74, E75, E77, E79, E80, E81, E85, E87, E89,
E90, E91, E92, E93, E94);
    General_Capital_Outlay = sum(F01, F03, F04, F05, F12, F16, F18,
F21, F22, F23, F24, F25, F26, F29, F31, F32, F36, F44, F45, F50, F52, F55,
F56, F59, F60, F61, F62, F66, F77, F79, F80, F81, F85, F87, F89, G01, G03,
G04, G05, G12, G16, G18, G21, G22, G23, G24, G25, G26, G29, G31, G32, G36,
G44, G45, G50, G52, G55, G56, G59, G60, G61, G62, G66, G77, G79, G80, G81,
G85, G87, G89);
    General_Construction = sum(F01, F03, F04, F05, F12, F16, F18,
F21, F22, F23, F24, F25, F26, F29, F31, F32, F36, F44, F45, F50, F52, F55,
F56, F59, F60, F61, F62, F66, F77, F79, F80, F81, F85, F87, F89, F90, F91,
F92, F93, F94);
    General_Assist__Sub = Tot_Assist__Subsidies;
    General_Debt_Interest = I89;

```

```

        General_Current_Expnd = sum(General_Expenditure, -
General_Capital_Outlay);

    * Air Transport;
    Air_Trans_Total_Expnd = sum(E01 , F01 , G01 , L01 , M01);
    Air_Trans_Direct_Expnd = sum(E01 , F01 , G01);
    Air_Trans_Cap_Outlay = sum(F01 , G01);
    Air_Trans_Construction = F01;
    Air_Trans_IG_To_State = L01;
    Air_Trans_IG_Local_Govts = M01;

    * Misc Commercial Activities;
    Misc_Com_Activ_Tot_Exp = sum(E03 , F03 , G03);
    Misc_Com_Activ_Cap_Out = sum(F03 , G03);
    Misc_Com_Activ_Constr = F03;

    * Correctional Institutions;
    Correct_Total_Exp = sum(E04 , F04 , G04 , E05 , F05 , G05 , L04 ,
L05 , M04 , M05);
    Correct_Direct_Exp = sum(E04 , E05 , F04 , G04 , F05 , G05);
    Correct_Cap_Outlay = sum(F04 , G04 , F05 , G05);
    Correct_Construct = sum(F04 , F05);
    Correct_IG_To_St = sum(L04 , L05);
    Correct_IG_Loc_Govts = sum(M04 , M05);

    * Missing national defense code 06;

    * Education;
    Total_Educ_Total_Exp = sum(E12, F12, G12, E16, F16, G16, E18,
F18, G18, J19, E21, F21, G21, L12, M12, Q12, L18, M18, L21, M21);
    Total_Educ_Direct_Exp = sum(E12, F12, G12, E16, F16, G16, E18,
F18, G18, J19, E21, F21, G21);
    Total_Educ_Assist__Sub = J19;
    Total_Educ_Cap_Outlay = sum(F12, F16, F18, F21, G12, G16, G18,
G21);
    Total_Educ_Construct = sum(F12 , F16 , F18 , F21);
    * Elementary and Secondary Education;
    Elem_Educ_Total_Exp = sum(E12, F12, G12, L12, M12, Q12);
    Elem_Educ_Direct_Exp = sum(E12, F12, G12);
    Elem_Educ_Cap_Outlay = sum(F12, G12);
    Elem_Educ_Construction = F12;
    Elem_Educ_IG_To_State = L12;
    Elem_Educ_IG_Local_Govts = M12;
    Elem_Educ_IG_Sch_to_Sch = Q12;
    * Higher Education;
    Higher_Ed_Total_Exp = sum(E16, E18, F16, F18, G16, G18, L18,
M18);
    Higher_Ed_Direct_Exp = sum(E16, E18, F16, F18, G16, G18);
    Higher_Ed_Cap_Outlay = sum(F16, F18, G16, G18);
    Higher_Ed_Construct = sum(F16, F18);
    Higher_Ed_IG_To_St = L18;
    Higher_Ed_IG_Loc_Govts = M18;
    * Education not otherwise classified;
    Educ_NEC_Total_Expnd = sum(E21, F21, G21, L21, M21);
    Educ_NEC_Direct_Expnd = sum(E21, F21, G21);
    Educ_NEC_Assistance = .; *The prior code, E19 no longer exists
in the data;

```

```

Educ_NEC_Cap_Outlay = sum(F21, G21);
Educ_NEC_Construction = F21;
Educ_NEC_IG_To_State = L21;
Educ_NEC_IG_Local_Govts = M21;

* Missing post offices code 14;

*Employment Security Administration;
Emp_Sec_Adm_Direct_Exp = sum(E22 , F22 , G22);
Emp_Sec_Adm_Cap_Outlay = sum(F22 , G22);
Emp_Sec_Adm_Construct = F22;

*Financial Administration;
Fin_Admin_Total_Exp = sum(E23, F23, G23, L23, M23);
Fin_Admin_Direct_Exp = sum(E23, F23, G23);
Fin_Admin_Cap_Outlay = sum(F23, G23);
Fin_Admin_Construction = F23;
Fin_Admin_IG_To_State = L23;
Fin_Admin_IG_Local_Govts = M23;

*Fire protection;
Fire_Prot_Total_Expend = sum(E24, F24, G24, L24, M24);
Fire_Prot_Direct_Exp = sum(E24, F24, G24);
Fire_Prot_Cap_Outlay = sum(F24, G24);
Fire_Prot_Construction = F24;
Fire_Prot_IG_To_State = L24;
Fire_Prot_IG_Local_Govts = M24;

*Judicial Expenditures;
Judicial_Total_Expend = sum(E25, F25, G25, L25, M25);
Judicial_Direct_Expend = sum(E25, F25, G25);
Judicial_Cap_Outlay = sum(F25, G25);
Judicial_Construction = F25;
Judicial_IG_To_State = L25;
Judicial_IG_Local_Govts = M25;

*Central Staff Services;
Cen_Staff_Total_Expend = sum(E29, F29, G29, L29, M29);
Cen_Staff_Direct_Exp = sum(E29, F29, G29);
Cen_Staff_Cap_Outlay = sum(F29, G29);
Cen_Staff_Construction = F29;
Cen_Staff_IG_To_State = L29;
Cen_Staff_IG_Local_Govts = M29;

* General Public Buildings;
Gen_Pub_Bldg_Total_Exp = sum(E31, F31, G31);
Gen_Pub_Bldg_Cap_Out = sum(F31, G31);
Gen_Pub_Bldg_Construct = F31;

* Health;
Health_Total_Expend = sum(E32, F32, G32, L32, M32);
Health_Direct_Expend = sum(E32, F32, G32);
Health_Capital_Outlay = sum(F32, G32);
Health_Construction = F32;
Health_IG_To_State = L32;
Health_IG_Local_Govts = M32;

```

```

*Hospitals;
Total_Hospital_Total_Exp = sum(E36, F36, G36, L36, M36);
Total_Hospital_Dir_Exp = sum(E36, F36, G36);
Total_Hospital_Cap_Out = sum(F36, G36);
Total_Hospital_Construct = F36;
Total_Hospital_IG_To_State = L36;
Total_Hospital_IG_Loc_Govts = M36;

*Federal Owned Hospitals - Veterans;
Own_Hospital_Total_Exp = sum(E37, F37, G37);
Own_Hospital_Cap_Out = sum(F37, G37);
Own_Hospital_Construct = F37;

* Other Hospital Expenses - Federal but not veterans;
Hosp_Other_Total_Exp = sum(E39, F39, G39, L39, M39);
Hosp_Other_Direct_Exp = sum(E39, F39, G39);
Hosp_Other_Cap_Outlay = sum(F39, G39);
Hosp_Other_Construct = F39;
Hosp_Other_IG_To_State = L39;
Hosp_Other_IG_Loc_Govts = M39;

* Highways;
Total_Highways_Tot_Exp = sum(E44, F44, G44, E45, F45, G45, L44,
M44);
Total_Highways_Dir_Exp = sum(E44, F44, G44, E45, F45, G45);
Total_Highways_Cap_Out = sum(F44, G44, F45, G45);
Total_Highways_Construct = sum(F44, F45);

* Non-Toll Highways;
Regular_Hwy_Total_Exp = sum(E44, F44, G44, L44, M44);
Regular_Hwy_Direct_Exp = sum(E44, F44, G44);
Regular_Hwy_Cap_Outlay = sum(F44, G44);
Regular_Hwy_Construct = F44;
Regular_Hwy_IG_To_Sta = L44;
Regular_Hwy_IG_Loc_Govts = M44;

* Toll Highways;
Toll_Hwy_Total_Expend = sum(E45, F45, G45);
Toll_Hwy_Cap_Outlay = sum(F45, G45);
Toll_Hwy_Construction = F45;

* Transit Subsidies - These data were eliminated in the 2005
data;
Transit_Sub_Total_Exp = .;
Transit_Sub_Direct_Sub = .;
Transit_Sub_IG_To_Sta = .;
Transit_Sub_IG_Loc_Govts = .;
Transit_Sub_To_Own_Sys = .;

*Housing and Community Development;
Hous___Com_Total_Exp = sum(E50, F50, G50, L50, M50);
Hous___Com_Direct_Exp = sum(E50, F50, G50);
Hous___Com_Cap_Outlay = sum(F50, G50);
Hous___Com_Construct = F50;
Hous___Com_IG_To_State = L50;
Hous___Com_IG_Loc_Govts = M50;

```

```

* Libraries;
Libraries_Total_Expnd = sum(E52, F52, G52, L52, M52);
Libraries_Direct_Exp = sum(E52, F52, G52);
Libraries_Cap_Outlay = sum(F52, G52);
Libraries_Construction = F52;
Libraries_IG_To_State = L52;
Libraries_IG_Local_Govts = M52;

*Natural Resources;
Natural_Res_Total_Exp = sum(E55, F55, G55, M55, E56, F56, G56,
M56, E59, F59, G59, L59, M59);
Natural_Res_Direct_Exp = sum(E55, F55, G55, E56, F56, G56, E59,
F59, G59);
Natural_Res_Cap_Outlay = sum(F55, G55, F56, G56, F59, G59);
Natural_Res_Construct = sum(F55, F56, F59);
Natural_Res_IG_To_Sta = L59;
Natural_Res_IG_Loc_Govts = sum(M55, M56 , M59);

* Parking Facilities;
Parking_Total_Expnd = sum(E60, F60, G60, L60, M60);
Parking_Direct_Expnd = sum(E60, F60, G60);
Parking_Capital_Outlay = sum(F60, G60);
Parking_Construction = F60;
Parking_IG_To_State = L60;
Parking_IG_Local_Govts = M60;

* Parks and Recreation;
Parks__Rec_Total_Exp = sum(E61, F61, G61, L61, M61);
Parks__Rec_Direct_Exp = sum(E61, F61, G61);
Parks__Rec_Cap_Outlay = sum(F61, G61);
Parks__Rec_Construct = F61;
Parks__Rec_IG_To_Sta = L61;
Parks__Rec_IG_Loc_Govts = M61;

* Police Protection;
Police_Prot_Total_Exp = sum(E62, F62, G62, L62, M62);
Police_Prot_Direct_Exp = sum(E62, F62, G62);
Police_Prot_Cap_Outlay = sum(F62, G62);
Police_Prot_Construct = F62;
Police_Prot_IG_To_Sta = L62;
Police_Prot_IG_Loc_Govts = M62;

* Protective Inspection and Regulation;
Prot_Insp_Total_Exp = sum(E66, F66, G66, L66, M66);
Prot_Insp_Direct_Exp = sum(E66, F66, G66);
Prot_Insp_Cap_Outlay = sum(F66, G66);
Prot_Insp_Construction = F66;
Prot_Insp_IG_To_State = L66;
Prot_Insp_IG_Local_Govts = M66;

* Public Welfare;
Public_Welf_Total_Exp = sum(J67, L67, M67, J68 , M68, E74, E75,
S74, E77, F77, G77, E79, F79, G79, L79, M79);
Public_Welf_Direct_Exp = sum(J67, J68 , E74, E75, E77, F77, G77,
E79, F79, G79);
Public_Welf_Cash_Asst = sum(J67, J68, M67, M68);
Public_Welf_Cap_Outlay = sum(F77, G77, F79, G79);

```

```

Public_Welf_Construct = sum(F77, F79);

* Public Welfare-Categorical Assistance Programs;
Welf_Categ_Total_Exp = sum(J67, L67, M67);
Welf_Categ_Cash_Assist = J67;
Welf_Categ_IG_To_State = L67;
Welf_Categ_IG_Loc_Govts = M67;

* Public Welfare-Cash assistance payments;
Welf_Cash_Total_Exp = sum(J68, M68);
Welf_Cash_Cash_Assist = J68;
Welf_Cash_IG_Local_Govts = M68;

* Public Welfare-Vendor Payments;
Welf_Vend_Pmts_Medical = E74;
Welf_Vend_Pmts_NEC = E75;

* State Share of Medicare Part D;
Welf_State_Share_Part_D = S74;

* Public Welfare-Institutions;
Welf_Ins_Total_Exp = sum(E77, F77, G77);
Welf_Ins_Cap_Outlay = sum(F77, G77);
Welf_Ins_Construction = F77;

*Public Welfare not elsewhere classified;
Welf_NEC_Total_Expend = sum(E79, F79, G79, L79, M79);
Welf_NEC_Direct_Expend = sum(E79, F79, G79);
Welf_NEC_Cap_Outlay = sum(F79, G79);
Welf_NEC_Construction = F79;
Welf_NEC_IG_To_State = L79;
Welf_NEC_IG_Local_Govts = M79;

*Sewerage;
Sewerage_Total_Expend = sum(E80, F80, G80, L80, M80);
Sewerage_Direct_Expend = sum(E80, F80, G80);
Sewerage_Cap_Outlay = sum(F80, G80);
Sewerage_Construction = F80;
Sewerage_IG_To_State = L80;
Sewerage_IG_Local_Govts = M80;

*Solid Waste Management;
SW_Mgmt_Total_Expend = sum(E81, F81, G81, L81, M81);
SW_Mgmt_Direct_Expend = sum(E81, F81, G81);
SW_Mgmt_Capital_Outlay = sum(F81, G81);
SW_Mgmt_Construction = F81;
SW_Mgmt_IG_To_State = L81;
SW_Mgmt_IG_Local_Govts = M81;

*Sea and Inland Port Facilities;
Water_Trans_Total_Exp = sum(E87, F87, G87, L87, M87);
Water_Trans_Direct_Exp = sum(E87, F87, G87);
Water_Trans_Cap_Outlay = sum(F87, G87);
Water_Trans_Construct = F87;
Water_Trans_IG_To_Sta = L87;
Water_Trans_IG_Loc_Govts = M87;

```

```

*Interest on General Debt;
Interest_on_Gen_Debt = I89;

* General Expenditure not elsewhere classified;
General_NEC_Total_Exp = sum(E89, F89, G89, L89, M89, S89, J89);
General_NEC_Direct_Exp = sum(E89, F89, G89, J89);
VetBonus = J89;
General_NEC_Cap_Outlay = sum(F89, G89);
General_NEC_Construct = F89;
General_NEC_IG_To_St = L89;
General_NEC_IG_Loc_Govts = M89;
General_NEC_IG_To_Fed = S89;

* Liquor Stores;
Liquor_Stores_Tot_Exp = sum(E90, F90, G90);
Liquor_Stores_Cap_Out = sum(F90, G90);
Liquor_Stores_Constr = F90;

* Total Utilities;
Total_Util_Total_Exp = sum(E91, I91, F91, G91, L91, M91, E92,
I92, F92, G92, L92, M92, E93, I93, F93, G93, L93, M93, E94, I94, F94, G94,
L94, M94);
Total_Util_Inter_Exp = sum(I91, I92, I93, I94);
Total_Util_Cap_Outlay = sum(F91, F92, F93, F94, G91, G92, G93,
G94);
Total_Util_Construct = sum(F91, F92, F93, F94);

* Water Supply Utilities;
Water_Util_Total_Exp = sum(E91, I91, F91, G91, L91, M91);
Water_Util_Inter_Exp = I91;
Water_Util_Cap_Outlay = sum(F91, G91);
Water_Util_Construct = F91;

* Electric Power Utilities;
Elec_Util_Total_Exp = sum(E92, I92, F92, G92, L92, M92);
Elec_Util_Inter_Exp = I92;
Elec_Util_Cap_Outlay = sum(F92, G92);
Elec_Util_Construct = F92;

* Gas Supply Utilities;
Gas_Util_Total_Exp = sum(E93, I93, F93, G93, L93, M93);
Gas_Util_Inter_Exp = I93;
Gas_Util_Cap_Outlay = sum(F93, G93);
Gas_Util_Construct = F93;

* Transit System Utilities;
Trans_Util_Total_Exp = sum(E94, I94, F94, G94, L94, M94);
Trans_Util_Inter_Exp = I94;
Trans_Util_Cap_Outlay = sum(F94, G94);
Trans_Util_Construct = F94;

* Employee Retirement;
Emp_Ret_Total_Expend = sum(X11, X12);
Emp_Ret_Benefit_Paymts = X11;
Emp_Ret_Withdrawals = X12;
Emp_Ret_Other_Paymts = .; *This code used to be X14 is now
obsolete since 2002 represented realized losses and is coded elsewhere;

```

```

* Unemployment Compensation;
Unemp_Comp_Total_Exp = sum(Y05, Y06);
Unemp_Comp_Ben_Paymts = Y05;
Unemp_Ext___Spec_Pmts = Y06;

* Debt totals;
Total_Debt_Outstanding = sum(_44T, _49U, _64V);
Total_Long_Term_Debt_Out = sum(_44T, _49U);
ST_Debt_End_of_Year = _64V;

* Beginning Long Term Debt Outstanding;
Total_Beg_LTD_Out = sum(_19T, _19U);
Beg_LTD_Out_Private_Purp = _19T;
Beg_LTD_Out_All_Other = _19U;
Beg_LTD_Out_Utility = .; *All detailed debt codes were
discontinued in 2005;
Beg_LTD_Out_Water_Util = .;
Beg_LTD_Out_Elec_Util = .;
Beg_LTD_Out_Gas_Util = .;
Beg_LTD_Out_Trans_Util = .;
Beg_LTD_Out_General = .;
Beg_LTD_Out_Education = .;
Beg_LTD_Out_Priv_Purp = .;
Beg_LTD_Out_Other_NEC = .;

* Long Term Debt Issued;
Total_LTD_Issued = sum(_24T, _29U);
LTD_Iss_Private_Purp = _24T;
LTD_Iss_All_Other = _29U;
LTD_Iss_Utility = .;
LTD_Iss_Util_Water = .;
LTD_Iss_Util_Electric = .;
LTD_Iss_Util_Gas_Supply = .;
LTD_Iss_Util_Transit = .;
LTD_Iss_General = .;
LTD_Iss_Gen_Elem_Educ = .;
LTD_Iss_Gen_Other_Educ = .;
LTD_Iss_Gen_Other_NEC = .;

* Long-Term Debt Issued, Full-Faith and Credit; *Codes
discontinued in 2005;
Total_LTD_Iss_FFC = .;
LTD_Iss_FFC_Utility = .;
LTD_Iss_FFC_Water_Util = .;
LTD_Iss_FFC_Elec_Util = .;
LTD_Iss_FFC_Gas_Util = .;
LTD_Iss_FFC_Trans_Util = .;
LTD_Iss_FFC_General = .;
LTD_Iss_FFC_Elem_Educ = .;
LTD_Iss_FFC_Other_Educ = .;
LTD_Iss_FFC_Other_NEC = .;

* Long-Term Debt Issued, Nonguaranteed;
Total_LTD_Iss_NG = .;
LTD_Iss_NG_Utility = .;
LTD_Iss_NG_Water_Util = .;

```

```

LTD_Iss_NG_Elec_Util = .;
LTD_Iss_NG_Gas_Util = .;
LTD_Iss_NG_Trans_Util = .;
LTD_Iss_NG_General = .;
LTD_Iss_NG_Elem_Educ = .;
LTD_Iss_NG_Other_Educ = .;
LTD_Iss_NG_Private_Purp = .;
LTD_Iss_NG_Other_NEC = .;

* Long-Term Debt Issued, Unspecified Issue;
Total_LTD_Iss_Unsp = .;
LTD_Iss_Unsp_Utility = .;
LTD_Iss_Unsp_Water_Util = .;
LTD_Iss_Unsp_Elec_Util = .;
LTD_Iss_Unsp_Gas_Util = .;
LTD_Iss_Unsp_Trans_Util = .;
LTD_Iss_Unsp_General = .;
LTD_Iss_Unsp_Elem_Educ = .;
LTD_Iss_Unsp_Other_Educ = .;
LTD_Iss_Unsp_Other_NEC = .;

*Long-Term Debt Retired During Fiscal Year;
Total_LTD_Retired = sum(_34T, _39U);
LTD_Ret_Private_Purp = _34T;
LTD_Ret_All_Other = _39U;
LTD_Ret_Utility = .;
LTD_Ret_Util_Water = .;
LTD_Ret_Util_Electric = .;
LTD_Ret_Util_Gas_Supply = .;
LTD_Ret_Util_Transit = .;
LTD_Ret_General = .;
LTD_Ret_Gen_Elem_Educ = .;
LTD_Ret_Gen_Other_Educ = .;
LTD_Ret_Gen_Other_NEC = .;

* Long-Term Debt Retired, Full-Faith and Credit;
Total_LTD_Ret_FFC = .;
LTD_Ret_FFC_Utility = .;
LTD_Ret_FFC_Water_Util = .;
LTD_Ret_FFC_Elec_Util = .;
LTD_Ret_FFC_Gas_Util = .;
LTD_Ret_FFC_Trans_Util = .;
LTD_Ret_FFC_General = .;
LTD_Ret_FFC_Elem_Educ = .;
LTD_Ret_FFC_Other_Educ = .;
LTD_Ret_FFC_Other_NEC = .;

* Long-Term Debt Retired, Nonguaranteed;
Total_LTD_Ret_NG = .;
LTD_Ret_NG_Utility = .;
LTD_Ret_NG_Water_Util = .;
LTD_Ret_NG_Elec_Util = .;
LTD_Ret_NG_Gas_Util = .;
LTD_Ret_NG_Trans_Util = .;
LTD_Ret_NG_General = .;
LTD_Ret_NG_Elem_Educ = .;
LTD_Ret_NG_Other_Educ = .;

```

```

LTD_Ret_NG_Private_Purp = .;
LTD_Ret_NG_Other_NEC = .;

* Long-Term Debt Retired, Unspecified;
Total_LTD_Ret_Unsp = .;
LTD_Ret_Unsp_Utility = .;
LTD_Ret_Unsp_Water_Util = .;
LTD_Ret_Unsp_Elec_Utili = .;
LTD_Ret_Unsp_Gas_Util = .;
LTD_Ret_Unsp_Trans_Util = .;
LTD_Ret_Unsp_General = .;
LTD_Ret_Unsp_Elem_Educ = .;
LTD_Ret_Unsp_Other_Educ = .;
LTD_Ret_Unsp_Other_NEC = .;

* Long-Term Debt Outstanding;
Total_LTD_Out = sum(_44T, _49U);
LTD_Out_Private_Purp = _44T;
LTD_Out_All_Other = _49U;
Total_LTD_Out_Utility = .;
LTD_Out_Util_Water = .;
LTD_Out_Util_Electric = .;
LTD_Out_Util_Gas_Supply = .;
LTD_Out_Util_Transit = .;
LTD_Out_General = .;
LTD_Out_Gen_Elem_Educ = .;
LTD_Out_Gen_Other_Educ = .;
LTD_Out_Gen_Other_NEC = .;

* Long-Term Debt Outstanding, Full-Faith and Credit;
Total_LTD_Out_FFC = .;
LTD_Out_FFC_Utility = .;
LTD_Out_FFC_Water_Util = .;
LTD_Out_FFC_Elec_Util = .;
LTD_Out_FFC_Gas_Util = .;
LTD_Out_FFC_Trans_Util = .;
LTD_Out_FFC_General = .;
LTD_Out_FFC_Elem_Educ = .;
LTD_Out_FFC_Other_Educ = .;
LTD_Out_FFC_Other_NEC = .;

* Long-Term Debt Outstanding, Nonguaranteed;
Tot_LTD_Out_NG = .;
LTD_Out_NG_Utility = .;
LTD_Out_NG_Water_Util = .;
LTD_Out_NG_Elec_Util = .;
LTD_Out_NG_Gas_Util = .;
LTD_Out_NG_Trans_Util = .;
LTD_Out_NG_General = .;
LTD_Out_NG_Elem_Educ = .;
LTD_Out_NG_Other_Educ = .;
LTD_Out_NG_Private_Purp = .;
LTD_Out_NG_Other_NEC = .;

* Cash and Securities;
Total_Cash_Securities = sum(W01, W31, W61, X21, X30, Z77, Z78,
X42, X44, X47, Y07, Y08, Y21, Y61);

```

```

        * Insurance Trust Funds Only Cash and Securities;
        Insur_Trust_Cash___Sec = sum(X21, X30, Z77, Z78, X42, X44, X47,
Y07, Y08, Y21, Y61);

        * Employee Retirement Systems Cash and Securities;
        Emp_Retire_Cash___Sec = sum(X21, X30, X35, Z77, Z78, X42, X47,
X44);
        Emp_Retire_Cash___Dep = X21;
        Emp_Retire_Total_Sec = sum(X30, X35, Z77, Z78, X42, X47, X44);
        Emp_Retire_Sec_Tot_Fed = X30;
        Emp_Retire_Sec_S_L_Secur = X35;
        Emp_Retire_Sec_Tot_Nong = sum(Z77, Z78, X42, X47, X44);
        Emp_Retire_Sec_Corp_Bds = Z77;
        Emp_Retire_Sec_Corp_Stk = Z78;
        Emp_Retire_Sec_Mortgages = X42;
        Emp_Retire_Sec_Misc_Inv = X47;
        Emp_Retire_Sec_Oth_Nong = X44;

        * Unemployment Compensation Funds Cash and Securities;
        Unemp_Comp_Cash___Sec = sum(Y07, Y08);
        Unemp_Comp_Bal_In_US_Tr = Y07;
        Unemp_Comp_Other_Balance = Y08;

        * Other Insurance Trusts Holdings Cash and Securities;
        Nonin_Trust_Cash___Sec = sum(W01, W31, W61);

        * Sinking Funds (debt service funds) Cash and Securities;
        Sinking_Fd_Cash___Sec = W01;

        * Bond Funds Cash and Securities;
        Bond_Fd_Cash___Sec = W31;

        * All Other Noninsurance Funds Cash and Securities;
        Oth_Nonin_Fd_Cash___Sec = W61;

run;

*Merge the older data with the newer data that has had its format converted;

Proc append base=LargeData data=ConvertedNewData force;
run;

Data LargestData;
    Set LargeData;

    *Calculate several totals from revenue data and to correct for
differences between old and new data;
        Motor_Vehicle_License_Total = sum(Motor_Vehicle_License,
Motor_Veh_Oper_License);
        Fed_IGR_Gen_Support = sum(Fed_IGR_Gen_Support, Fed_IGR_Gen_Rev_Shar);
        State_IGR_Gen_Sup = sum(State_IGR_Oth_Gen_Sup, State_IGR_Tax_Relief);
        Chg_Total_Elem_Education = sum(Chg_Elem_Ed_Sch_Lunch,
Chg_Elem_Ed_Tuition, Chg_Elem_Ed_NEC);
        Chg_Highways = sum(Chg_Regular_Highways, Chg_Toll_Highways);
        Prop_Sale_Total = sum(Prop_Sale_Hous_Com_Dev, Prop_Sale_Other);
        Total_Other_Capital_Outlays = sum(Total_Capital_Outlays, -
Total_Construction);

```

```

        General_Capital_Outlay_Other = sum(General_Capital_Outlay, -
General_Construction);

        *Calculate current expenditure data for every function where it is
missing;
        Air_Trans_Current_Exp = sum(Air_Trans_Direct_Exp, -
Air_Trans_Cap_Outlay);
        Misc_Com_Activ_Current_Exp = sum(Misc_Com_Activ_Tot_Exp, -
Misc_Com_Activ_Cap_Out);
        Correct_Current_Exp = sum(Correct_Direct_Exp, -Correct_Cap_Outlay);
        Total_Educ_Current_Exp = sum(Total_Educ_Direct_Exp, -
Total_Educ_Cap_Outlay);
        Elem_Educ_Current_Exp = sum(Elem_Educ_Direct_Exp, -
Elem_Educ_Cap_Outlay);
        Higher_Ed_Current_Exp = sum(Higher_Ed_Direct_Exp, -
Higher_Ed_Cap_Outlay);
        Educ_NEC_Current_Exp = sum(Educ_NEC_Direct_Exp, -
Educ_NEC_Cap_Outlay);
        Emp_Sec_Adm_Current_Exp = sum(Emp_Sec_Adm_Direct_Exp, -
Emp_Sec_Adm_Cap_Outlay);
        Fin_Admin_Current_Exp = sum(Fin_Admin_Direct_Exp, -
Fin_Admin_Cap_Outlay);
        Fire_Prot_Current_Exp = sum(Fire_Prot_Direct_Exp, -
Fire_Prot_Cap_Outlay);
        Judicial_Current_Exp = sum(Judicial_Direct_Exp, -
Judicial_Cap_Outlay);
        Cen_Staff_Current_Exp = sum(Cen_Staff_Direct_Exp, -
Cen_Staff_Cap_Outlay);
        Gen_Pub_Bldg_Current_Exp = sum(Gen_Pub_Bldg_Total_Exp, -
Gen_Pub_Bldg_Cap_Out);
        Health_Current_Exp = sum(Health_Direct_Exp, -Health_Capital_Outlay);
        Total_Hospital_Current_Exp = sum(Total_Hospital_Dir_Exp, -
Total_Hospital_Cap_Out);
        Own_Hospital_Current_Exp = sum(Own_Hospital_Total_Exp, -
Own_Hospital_Cap_Out);
        Hosp_Other_Current_Exp = sum(Hosp_Other_Direct_Exp, -
Hosp_Other_Cap_Outlay);
        Total_Highways_Current_Exp = sum(Total_Highways_Dir_Exp, -
Total_Highways_Cap_Out);
        Regular_Hwy_Current_Exp = sum(Regular_Hwy_Direct_Exp, -
Regular_Hwy_Cap_Outlay);
        Toll_Hwy_Current_Exp = sum(Toll_Hwy_Total_Exp, -
Toll_Hwy_Cap_Outlay);
        Hous___Com_Current_Exp = sum(Hous___Com_Direct_Exp, -
Hous___Com_Cap_Outlay);
        Libraries_Current_Exp = sum(Libraries_Direct_Exp, -
Libraries_Cap_Outlay);
        Natural_Res_Current_Exp = sum(Natural_Res_Direct_Exp, -
Natural_Res_Cap_Outlay);
        Parking_Current_Exp = sum(Parking_Direct_Exp, -
Parking_Capital_Outlay);
        Parks___Rec_Current_Exp = sum(Parks___Rec_Direct_Exp, -
Parks___Rec_Cap_Outlay);
        Police_Prot_Current_Exp = sum(Police_Prot_Direct_Exp, -
Police_Prot_Cap_Outlay);
        Prot_Insp_Current_Exp = sum(Prot_Insp_Direct_Exp, -
Prot_Insp_Cap_Outlay);

```

```

        Public_Welf_Current_Exp = sum(Public_Welf_Direct_Exp, -
Public_Welf_Cap_Outlay, -Public_Welf_Cash_Asst);
        Welf_Ins_Current_Exp = sum(Welf_Ins_Total_Exp, -Welf_Ins_Cap_Outlay);
        Welf_NEC_Current_Exp = sum(Welf_NEC_Direct_Exp, -
Welf_NEC_Cap_Outlay);
        Sewerage_Current_Exp = sum(Sewerage_Direct_Exp, -
Sewerage_Cap_Outlay);
        SW_Mgmt_Current_Exp = sum(SW_Mgmt_Direct_Exp, -
SW_Mgmt_Capital_Outlay);
        Water_Trans_Current_Exp = sum(Water_Trans_Direct_Exp, -
Water_Trans_Cap_Outlay);
        General_NEC_Current_Exp = sum(General_NEC_Direct_Exp, -
General_NEC_Cap_Outlay, -VetBonus);
        Liquor_Stores_Current_Exp = sum(Liquor_Stores_Tot_Exp, -
Liquor_Stores_Cap_Out);
        Total_Util_Current_Exp = sum(Total_Util_Total_Exp, -
Total_Util_Inter_Exp, -Total_Util_Cap_Outlay);
        Water_Util_Current_Exp = sum(Water_Util_Total_Exp, -
Water_Util_Inter_Exp, -Water_Util_Cap_Outlay);
        Elec_Util_Current_Exp = sum(Elec_Util_Total_Exp, -Elec_Util_Inter_Exp,
-Elec_Util_Cap_Outlay);
        Gas_Util_Current_Exp = sum(Gas_Util_Total_Exp, -Gas_Util_Inter_Exp, -
Gas_Util_Cap_Outlay);
        Trans_Util_Current_Exp = sum(Trans_Util_Total_Exp, -
Trans_Util_Inter_Exp, -Trans_Util_Cap_Outlay);

```

**run;**

\*Set the order of the variables in the largest data set. Only the variables to be placed at the front of the data set need to be listed in the retain statement.;

\*Also drop any variables that are unreliable according to the census, or that are both unneeded and unavailable in the newest data.;

**Data** LargestData (**Drop**= SortCode Census\_Region Weight YearDepSch YearRetire Version ReviseDate Data\_Flag JacketUnit ZeroData Imputed\_Record);

**Retain** SurveyYr Year4 YearofData ID IDChanged State\_Code Type\_Code County Name FIPS\_Code\_State FYEndDate YearPop SchLevCode Population FunctionCode Enrollment SurveyYr Year4 ID State\_Code Type\_Code County Name FIPS\_Code\_State FYEndDate YearPop SchLevCode Population Total\_Revenue Total\_Rev\_Own\_Sources General\_Revenue Gen\_Rev\_Own\_Sources Total\_Taxes Property\_Tax Tot\_Sales\_\_\_Gr\_Rec\_Tax Total\_Gen\_Sales\_Tax Total\_Select\_Sales\_Tax Alcoholic\_Beverage\_Tax Amusement\_Tax Insurance\_Premium\_Tax Motor\_Fuels\_Tax Pari\_mutuels\_Tax Public\_Utility\_Tax Tobacco\_Tax Other\_Select\_Sales\_Tax Total\_License\_Taxes Alcoholic\_Beverage\_Lic Amusement\_License Corporation\_License Hunting\_\_\_Fishing\_License Motor\_Vehicle\_License Motor\_Veh\_Oper\_License Motor\_Vehicle\_License\_Total Public\_Utility\_License Occup\_and\_Bus\_Lic\_NEC Other\_License\_Taxes Total\_Income\_Taxes Individual\_Income\_Tax Corp\_Net\_Income\_Tax Death\_and\_Gift\_Tax Docum\_and\_Stock\_Tr\_Tax Severance\_Tax Taxes\_NEC Total\_IG\_Revenue Total\_Fed\_IG\_Revenue Fed\_IGR\_Air\_Transport Fed\_IGR\_Education Fed\_IGR\_Emp\_Sec\_Adm Fed\_IGR\_Gen\_Rev\_Shar Fed\_IGR\_Gen\_Support Fed\_IGR\_Health\_\_\_Hos Fed\_IGR\_Highways Fed\_IGR\_Transit\_Sub Fed\_IGR\_Hous\_Com\_Dev Fed\_IGR\_Natural\_Res Fed\_IGR\_Public\_Welf Fed\_IGR\_Sewerage Fed\_IGR\_Other Total\_State\_IG\_Revenue State\_IGR\_Education State\_IGR\_Tax\_Relief State\_IGR\_Oth\_Gen\_Sup State\_IGR\_Gen\_Sup State\_IGR\_Health\_\_\_Hos State\_IGR\_Highways State\_IGR\_Transit\_Sub State\_IGR\_Hous\_Com\_Dev State\_IGR\_Public\_Welf

State\_IGR\_Sewerage State\_IGR\_Other Tot\_Local\_IG\_Rev Local\_IGR\_InterSchool\_Aid  
 Local\_IGR\_Other\_Education Local\_IGR\_Oth\_Gen\_Sup Local\_IGR\_Health\_Hos  
 Local\_IGR\_Highways  
 Local\_IGR\_Transit\_Sub Local\_IGR\_Hous\_Com\_Dev Local\_IGR\_Public\_Welf  
 Local\_IGR\_Sewerage Local\_IGR\_Other Tot\_Chgs\_and\_Misc\_Rev  
 Total\_General\_Charges Chg\_Air\_Transportation Chg\_Misc\_Com\_Activ  
 Chg\_Total\_Education Chg\_Total\_Elem\_Education Chg\_Elem\_Ed\_Sch\_Lunch  
 Chg\_Elem\_Ed\_Tuition Chg\_Elem\_Ed\_NEC Chg\_Total\_High\_Ed  
 Chg\_Hospitals Chg\_Highways Chg\_Regular\_Highways Chg\_Toll\_Highways  
 Chg\_Housing\_Comm\_Dev Chg\_Total\_Nat\_Res Chg\_Parking  
 Chg\_Parks\_Recreation Chg\_Sewerage Chg\_Solid\_Waste\_Mgmt  
 Chg\_Water\_Transport Chg\_All\_Other\_NEC Misc\_General\_Revenue  
 Special\_Assessments Prop\_Sale\_Total Prop\_Sale\_Hous\_Com\_Dev  
 Prop\_Sale\_Other Interest\_Revenue Fines\_and\_Forfeits  
 Rents\_and\_Royalties Net\_Lottery\_Revenue Misc\_General\_Rev\_NEC  
 Liquor\_Stores\_Revenue Total\_Utility\_Revenue Water\_Utility\_Revenue  
 Electric\_Utility\_Rev Gas\_Utility\_Rev Transit\_Utility\_Rev  
 Total\_Insur\_Trust\_Rev Total\_Insur\_Trust\_Ctrb Tot\_Ins\_Trust\_Inv\_Rev  
 Total\_Emp\_Ret\_Rev  
 Emp\_Ret\_Total\_Ctrib Emp\_Ret\_Loc\_Emp\_Ctrib Emp\_Ret\_Loc\_To\_Loc\_Sys  
 Emp\_Ret\_From\_Other\_Gov Emp\_Ret\_Sta\_To\_Sta\_Ctr Emp\_Ret\_Int\_Rev  
 Emp\_Ret\_Other\_Earnings Total\_Unemp\_Rev Unemp\_Payroll\_Tax  
 Unemp\_Int\_Revenue Unemp\_Federal\_Advances Total\_Expenditure  
 Total\_IG\_Expenditure Direct\_Expenditure Total\_Current\_Expend  
 Total\_Current\_Oper Total\_Capital\_Outlays Total\_Construction  
 Total\_Other\_Capital\_Outlays Tot\_Assist\_Subsidies Total\_Interest\_on\_Debt  
 Total\_Insur\_Trust\_Ben Total\_Salaries\_Wages  
 General\_Expenditure IG\_Exp\_To\_State\_Govt IG\_Exp\_To\_Local\_Govts  
 IG\_Exp\_To\_Federal\_Govt Direct\_General\_Expend General\_Current\_Expend  
 General\_Current\_Oper General\_Capital\_Outlay General\_Construction  
 General\_Capital\_Outlay\_Other General\_Assist\_Sub General\_Debt\_Interest  
 Air\_Trans\_Total\_Expend Air\_Trans\_Direct\_Expend Air\_Trans\_Cap\_Outlay  
 Air\_Trans\_Current\_Exp Air\_Trans\_Construction Air\_Trans\_IG\_To\_State  
 Air\_Trans\_IG\_Local\_Govts Misc\_Com\_Activ\_Tot\_Exp  
 Misc\_Com\_Activ\_Cap\_Out Misc\_Com\_Activ\_Current\_Exp  
 Misc\_Com\_Activ\_Constr Correct\_Total\_Exp Correct\_Direct\_Exp  
 Correct\_Cap\_Outlay Correct\_Current\_Exp Correct\_Construct  
 Correct\_IG\_To\_St Correct\_IG\_Loc\_Govts Total\_Educ\_Total\_Exp  
 Total\_Educ\_Direct\_Exp Total\_Educ\_Assist\_Sub Total\_Educ\_Cap\_Outlay  
 Total\_Educ\_Current\_Exp Total\_Educ\_Construct Elem\_Educ\_Total\_Exp  
 Elem\_Educ\_Direct\_Exp Elem\_Educ\_Cap\_Outlay Elem\_Educ\_Current\_Exp  
 Elem\_Educ\_Construction Elem\_Educ\_IG\_To\_State  
 Elem\_Educ\_IG\_Local\_Govts Elem\_Educ\_IG\_Sch\_to\_Sch  
 Higher\_Ed\_Total\_Exp Higher\_Ed\_Direct\_Exp Higher\_Ed\_Cap\_Outlay  
 Higher\_Ed\_Current\_Exp Higher\_Ed\_Construct Higher\_Ed\_IG\_To\_St  
 Higher\_Ed\_IG\_Loc\_Govts Educ\_NEC\_Total\_Expend Educ\_NEC\_Direct\_Expend  
 Educ\_NEC\_Assistance Educ\_NEC\_Cap\_Outlay Educ\_NEC\_Current\_Exp  
 Educ\_NEC\_Construction Educ\_NEC\_IG\_To\_State Educ\_NEC\_IG\_Local\_Govts  
 Emp\_Sec\_Adm\_Direct\_Exp Emp\_Sec\_Adm\_Cap\_Outlay Emp\_Sec\_Adm\_Current\_Exp  
 Emp\_Sec\_Adm\_Construct Fin\_Admin\_Total\_Exp Fin\_Admin\_Direct\_Exp  
 Fin\_Admin\_Cap\_Outlay Fin\_Admin\_Current\_Exp Fin\_Admin\_Construction  
 Fin\_Admin\_IG\_To\_State Fin\_Admin\_IG\_Local\_Govts  
 Fire\_Prot\_Total\_Expend Fire\_Prot\_Direct\_Exp  
 Fire\_Prot\_Cap\_Outlay Fire\_Prot\_Current\_Exp Fire\_Prot\_Construction  
 Fire\_Prot\_IG\_To\_State Fire\_Prot\_IG\_Local\_Govts  
 Judicial\_Total\_Expend Judicial\_Direct\_Expend Judicial\_Cap\_Outlay  
 Judicial\_Current\_Exp Judicial\_Construction Judicial\_IG\_To\_State

Judicial\_IG\_Local\_Govts Cen\_Staff\_Total\_Expend Cen\_Staff\_Direct\_Exp  
 Cen\_Staff\_Cap\_Outlay Cen\_Staff\_Current\_Exp Cen\_Staff\_Construction  
 Cen\_Staff\_IG\_To\_State Cen\_Staff\_IG\_Local\_Govts  
 Gen\_Pub\_Bldg\_Total\_Exp Gen\_Pub\_Bldg\_Cap\_Out Gen\_Pub\_Bldg\_Current\_Exp  
 Gen\_Pub\_Bldg\_Construct  
 Health\_Total\_Expend Health\_Direct\_Expend Health\_Capital\_Outlay  
 Health\_Current\_Exp Health\_Construction Health\_IG\_To\_State  
 Health\_IG\_Local\_Govts Total\_Hospital\_Total\_Exp  
 Total\_Hospital\_Dir\_Exp Total\_Hospital\_Cap\_Out  
 Total\_Hospital\_Current\_Exp Total\_Hospital\_Construct  
 Total\_Hospital\_IG\_To\_State Total\_Hospital\_IG\_Loc\_Govts  
 Own\_Hospital\_Total\_Exp Own\_Hospital\_Cap\_Out Own\_Hospital\_Current\_Exp  
 Own\_Hospital\_Construct Hosp\_Other\_Total\_Exp Hosp\_Other\_Direct\_Exp  
 Hosp\_Other\_Cap\_Outlay Hosp\_Other\_Current\_Exp Hosp\_Other\_Construct  
 Hosp\_Other\_IG\_To\_State  
 Hosp\_Other\_IG\_Loc\_Govts Total\_Highways\_Tot\_Exp Total\_Highways\_Dir\_Exp  
 Total\_Highways\_Cap\_Out Total\_Highways\_Current\_Exp  
 Total\_Highways\_Construct Regular\_Hwy\_Total\_Exp Regular\_Hwy\_Direct\_Exp  
 Regular\_Hwy\_Cap\_Outlay Regular\_Hwy\_Current\_Exp Regular\_Hwy\_Construct  
 Regular\_Hwy\_IG\_To\_Sta Regular\_Hwy\_IG\_Loc\_Govts  
 Toll\_Hwy\_Total\_Expend Toll\_Hwy\_Cap\_Outlay Toll\_Hwy\_Current\_Exp  
 Toll\_Hwy\_Construct Transit\_Sub\_Total\_Exp Transit\_Sub\_Direct\_Sub  
 Transit\_Sub\_IG\_To\_Sta Transit\_Sub\_IG\_Loc\_Govts  
 Transit\_Sub\_To\_Own\_Sys Hous\_\_\_Com\_Total\_Exp  
 Hous\_\_\_Com\_Direct\_Exp Hous\_\_\_Com\_Cap\_Outlay Hous\_\_\_Com\_Current\_Exp  
 Hous\_\_\_Com\_Construct Hous\_\_\_Com\_IG\_To\_State Hous\_\_\_Com\_IG\_Loc\_Govts  
 Libraries\_Total\_Expend Libraries\_Direct\_Exp Libraries\_Cap\_Outlay  
 Libraries\_Current\_Exp Libraries\_Construct Libraries\_IG\_To\_State  
 Libraries\_IG\_Local\_Govts Natural\_Res\_Total\_Exp  
 Natural\_Res\_Direct\_Exp Natural\_Res\_Cap\_Outlay Natural\_Res\_Current\_Exp  
 Natural\_Res\_Construct Natural\_Res\_IG\_To\_Sta Natural\_Res\_IG\_Loc\_Govts  
 Parking\_Total\_Expend Parking\_Direct\_Expend Parking\_Capital\_Outlay  
 Parking\_Current\_Exp Parking\_Construct Parking\_IG\_To\_State  
 Parking\_IG\_Local\_Govts Parks\_\_\_Rec\_Total\_Exp Parks\_\_\_Rec\_Direct\_Exp  
 Parks\_\_\_Rec\_Cap\_Outlay Parks\_\_\_Rec\_Current\_Exp Parks\_\_\_Rec\_Construct  
 Parks\_\_\_Rec\_IG\_To\_Sta Parks\_\_\_Rec\_IG\_Loc\_Govts  
 Police\_Prot\_Total\_Exp Police\_Prot\_Direct\_Exp Police\_Prot\_Cap\_Outlay  
 Police\_Prot\_Current\_Exp Police\_Prot\_Construct Police\_Prot\_IG\_To\_Sta  
 Police\_Prot\_IG\_Loc\_Govts Prot\_Insp\_Total\_Exp  
 Prot\_Insp\_Direct\_Exp Prot\_Insp\_Cap\_Outlay Prot\_Insp\_Current\_Exp  
 Prot\_Insp\_Construct Prot\_Insp\_IG\_To\_State  
 Prot\_Insp\_IG\_Local\_Govts Public\_Welf\_Total\_Exp Public\_Welf\_Direct\_Exp  
 Public\_Welf\_Cash\_Assst Public\_Welf\_Cap\_Outlay Public\_Welf\_Current\_Exp  
 Public\_Welf\_Construct Welf\_Categ\_Total\_Exp Welf\_Categ\_Cash\_Assist  
 Welf\_Categ\_IG\_To\_State Welf\_Categ\_IG\_Loc\_Govts Welf\_Cash\_Total\_Exp  
 Welf\_Cash\_Cash\_Assist Welf\_Cash\_IG\_Local\_Govts  
 Welf\_Vend\_Pmts\_Medical Welf\_Vend\_Pmts\_NEC Welf\_State\_Share\_Part\_D  
 Welf\_Ins\_Total\_Exp Welf\_Ins\_Cap\_Outlay Welf\_Ins\_Current\_Exp  
 Welf\_Ins\_Construct Welf\_NEC\_Total\_Expend  
 Welf\_NEC\_Direct\_Expend Welf\_NEC\_Cap\_Outlay Welf\_NEC\_Current\_Exp  
 Welf\_NEC\_Construct Welf\_NEC\_IG\_To\_State Welf\_NEC\_IG\_Local\_Govts  
 Sewerage\_Total\_Expend Sewerage\_Direct\_Expend Sewerage\_Cap\_Outlay  
 Sewerage\_Current\_Exp Sewerage\_Construct Sewerage\_IG\_To\_State  
 Sewerage\_IG\_Local\_Govts SW\_Mgmt\_Total\_Expend SW\_Mgmt\_Direct\_Expend  
 SW\_Mgmt\_Capital\_Outlay SW\_Mgmt\_Current\_Exp SW\_Mgmt\_Construct  
 SW\_Mgmt\_IG\_To\_State SW\_Mgmt\_IG\_Local\_Govts Water\_Trans\_Total\_Exp

|                           |                          |                         |
|---------------------------|--------------------------|-------------------------|
| Water_Trans_Direct_Exp    | Water_Trans_Cap_Outlay   | Water_Trans_Current_Exp |
| Water_Trans_Construct     |                          |                         |
| Water_Trans_IG_To_Sta     | Water_Trans_IG_Loc_Govts | Interest_on_Gen_Debt    |
| General_NEC_Total_Exp     | General_NEC_Direct_Exp   | VetBonus                |
| General_NEC_Cap_Outlay    | General_NEC_Current_Exp  | General_NEC_Construct   |
| General_NEC_IG_To_St      | General_NEC_IG_Loc_Govts |                         |
| General_NEC_IG_To_Fed     | Liquor_Stores_Tot_Exp    | Liquor_Stores_Cap_Out   |
| Liquor_Stores_Current_Exp | Liquor_Stores_Constr     | Total_Util_Total_Exp    |
| Total_Util_Inter_Exp      | Total_Util_Cap_Outlay    | Total_Util_Current_Exp  |
| Total_Util_Construct      | Water_Util_Total_Exp     | Water_Util_Inter_Exp    |
| Water_Util_Cap_Outlay     | Water_Util_Current_Exp   | Water_Util_Construct    |
| Elec_Util_Total_Exp       | Elec_Util_Inter_Exp      | Elec_Util_Cap_Outlay    |
| Elec_Util_Current_Exp     | Elec_Util_Construct      | Gas_Util_Total_Exp      |
| Gas_Util_Inter_Exp        | Gas_Util_Cap_Outlay      | Gas_Util_Current_Exp    |
| Gas_Util_Construct        | Trans_Util_Total_Exp     | Trans_Util_Inter_Exp    |
| Trans_Util_Cap_Outlay     | Trans_Util_Current_Exp   | Trans_Util_Construct    |
| Emp_Ret_Total_Expend      | Emp_Ret_Benefit_Paymts   | Emp_Ret_Withdrawals     |
| Emp_Ret_Other_Paymts      | Unemp_Comp_Total_Exp     | Unemp_Comp_Ben_Paymts   |
| Unemp_Ext_Spec_Pmts       |                          |                         |
| Total_Debt_Outstanding    | Total_Long_Term_Debt_Out | ST_Debt_End_of_Year     |
| Total_Beg_LTD_Out         | Beg_LTD_Out_Private_Purp | Beg_LTD_Out_All_Other   |
| Beg_LTD_Out_Utility       | Beg_LTD_Out_Water_Util   | Beg_LTD_Out_Elec_Util   |
| Beg_LTD_Out_Gas_Util      | Beg_LTD_Out_Trans_Util   | Beg_LTD_Out_General     |
| Beg_LTD_Out_Education     | Beg_LTD_Out_Priv_Purp    | Beg_LTD_Out_Other_NEC   |
| Total_LTD_Issued          | LTD_Iss_Private_Purp     | LTD_Iss_All_Other       |
| LTD_Iss_Utility           | LTD_Iss_Util_Water       | LTD_Iss_Util_Electric   |
| LTD_Iss_Util_Gas_Supply   | LTD_Iss_Util_Transit     | LTD_Iss_General         |
| LTD_Iss_Gen_Elem_Educ     | LTD_Iss_Gen_Other_Educ   | LTD_Iss_Gen_Other_NEC   |
| Total_LTD_Iss_FFC         | LTD_Iss_FFC_Utility      | LTD_Iss_FFC_Water_Util  |
| LTD_Iss_FFC_Elec_Util     | LTD_Iss_FFC_Gas_Util     | LTD_Iss_FFC_Trans_Util  |
| LTD_Iss_FFC_General       | LTD_Iss_FFC_Elem_Educ    | LTD_Iss_FFC_Other_Educ  |
| LTD_Iss_FFC_Other_NEC     | Total_LTD_Iss_NG         | LTD_Iss_NG_Utility      |
| LTD_Iss_NG_Water_Util     | LTD_Iss_NG_Elec_Util     | LTD_Iss_NG_Gas_Util     |
| LTD_Iss_NG_Trans_Util     | LTD_Iss_NG_General       | LTD_Iss_NG_Elem_Educ    |
| LTD_Iss_NG_Other_Educ     | LTD_Iss_NG_Private_Purp  | LTD_Iss_NG_Other_NEC    |
| Total_LTD_Iss_Unsp        | LTD_Iss_Unsp_Utility     | LTD_Iss_Unsp_Water_Util |
| LTD_Iss_Unsp_Elec_Util    | LTD_Iss_Unsp_Gas_Util    | LTD_Iss_Unsp_Trans_Util |
| LTD_Iss_Unsp_General      | LTD_Iss_Unsp_Elem_Educ   | LTD_Iss_Unsp_Other_Educ |
| LTD_Iss_Unsp_Other_NEC    | Total_LTD_Retired        | LTD_Ret_Private_Purp    |
| LTD_Ret_All_Other         | LTD_Ret_Utility          | LTD_Ret_Util_Water      |
| LTD_Ret_Util_Electric     | LTD_Ret_Util_Gas_Supply  | LTD_Ret_Util_Transit    |
| LTD_Ret_General           | LTD_Ret_Gen_Elem_Educ    | LTD_Ret_Gen_Other_Educ  |
| LTD_Ret_Gen_Other_NEC     | Total_LTD_Ret_FFC        | LTD_Ret_FFC_Utility     |
| LTD_Ret_FFC_Water_Util    | LTD_Ret_FFC_Elec_Util    | LTD_Ret_FFC_Gas_Util    |
| LTD_Ret_FFC_Trans_Util    | LTD_Ret_FFC_General      | LTD_Ret_FFC_Elem_Educ   |
| LTD_Ret_FFC_Other_Educ    | LTD_Ret_FFC_Other_NEC    | Total_LTD_Ret_NG        |
| LTD_Ret_NG_Utility        | LTD_Ret_NG_Water_Util    | LTD_Ret_NG_Elec_Util    |
| LTD_Ret_NG_Gas_Util       | LTD_Ret_NG_Trans_Util    | LTD_Ret_NG_General      |
| LTD_Ret_NG_Elem_Educ      | LTD_Ret_NG_Other_Educ    | LTD_Ret_NG_Private_Purp |
| LTD_Ret_NG_Other_NEC      | Total_LTD_Ret_Unsp       | LTD_Ret_Unsp_Utility    |
| LTD_Ret_Unsp_Water_Util   | LTD_Ret_Unsp_Elec_Util   | LTD_Ret_Unsp_Gas_Util   |
| LTD_Ret_Unsp_Trans_Util   | LTD_Ret_Unsp_General     | LTD_Ret_Unsp_Elem_Educ  |
| LTD_Ret_Unsp_Other_Educ   | LTD_Ret_Unsp_Other_NEC   | Total_LTD_Out           |
| LTD_Out_Private_Purp      | LTD_Out_All_Other        | Total_LTD_Out_Utility   |
| LTD_Out_Util_Water        | LTD_Out_Util_Electric    | LTD_Out_Util_Gas_Supply |
| LTD_Out_Util_Transit      | LTD_Out_General          | LTD_Out_Gen_Elem_Educ   |
| LTD_Out_Gen_Other_Educ    | LTD_Out_Gen_Other_NEC    | Total_LTD_Out_FFC       |

```

LTD_Out_FFC_Utility      LTD_Out_FFC_Water_Util  LTD_Out_FFC_Elec_Util
LTD_Out_FFC_Gas_Util     LTD_Out_FFC_Trans_Util  LTD_Out_FFC_General
LTD_Out_FFC_Elem_Educ    LTD_Out_FFC_Other_Educ  LTD_Out_FFC_Other_NEC
Tot_LTD_Out_NG           LTD_Out_NG_Utility      LTD_Out_NG_Water_Util
LTD_Out_NG_Elec_Util     LTD_Out_NG_Gas_Util     LTD_Out_NG_Trans_Util
LTD_Out_NG_General       LTD_Out_NG_Elem_Educ    LTD_Out_NG_Other_Educ
LTD_Out_NG_Private_Purp  LTD_Out_NG_Other_NEC    Total_Cash___Securities
Insur_Trust_Cash___Sec   Emp_Retire_Cash___Sec   Emp_Retire_Cash___Dep
Emp_Retire_Total_Sec     Emp_Retire_Sec_Tot_Fed
Emp_Retire_Sec_S_L_Secur Emp_Retire_Sec_Tot_Nong
Emp_Retire_Sec_Corp_Bds Emp_Retire_Sec_Corp_Stk
Emp_Retire_Sec_Mortgages
Emp_Retire_Sec_Misc_Inv Emp_Retire_Sec_Oth_Nong Unemp_Comp_Cash___Sec
Unemp_Comp_Bal_In_US_Tr  Unemp_Comp_Other_Balance
Nonin_Trust_Cash___Sec   Sinking_Fd_Cash___Sec   Bond_Fd_Cash___Sec
Oth_Nonin_Fd_Cash___Sec FunctionCode Enrollment;
Set LargestData;
run;

```

\* Write the final file to a delimited text file, change this path to define a valid location for the file on your system;

```

Proc Export Data=work.LargestData
  outfile='E:/CensusData/AllCensusData.csv'
  dbms=CSV
  replace;
run;

```
