# Supplementary material for: The Government Finance Database: A Common Resource for Quantitative Research in Public Financial Analysis
Source: PLoS One. 2015 Jun 24;10(6):e0130119. doi: 10.1371/journal.pone.0130119 (PMC4479543; doi:10.1371/journal.pone.0130119)
Supplement: S5 File — This file includes the township data from the Government Finance Database at the time of publication, the appendix for the Government Finance Database, and the U.S. Census 2006 Classification manual. For more up to date versions of the data please visit http://www.willamette.edu/mba/research_impact/public_datasets/. (ZIP) [file pone.0130119.s005.zip]

Archive with 4 entries (4 files):
- 2006_classification_manual.pdf
- Appendix For The Government Finance Database.pdf
- TownshipData.csv
- PLoS ONE The Government Finance Database.pdf
